# Supplementary material for: Prognostic association supports indexing size measures in echocardiography by body surface area
Source: bioRxiv or medRxiv preprint supplement (doi:10.1101/2021.12.09.21267530), 2022-12-21
Supplement: Supplementary file [file media-1.pdf]

**Supplementary table 1.** Subject characteristics for patients with available follow-up data for the respective cardiac or aortic measures. RA = right atrial, RV = right ventricular, RVOT = right ventricular outflow tract, LA = left atrial, LV = left ventricular, IVS = interventricular septum.

|                   | RA area                     |                               |                           |                | RV diameter                 |                               |                           |                | RVOT diameter               |                               |                           |                |
|-------------------|-----------------------------|-------------------------------|---------------------------|----------------|-----------------------------|-------------------------------|---------------------------|----------------|-----------------------------|-------------------------------|---------------------------|----------------|
|                   | BMI <18.5 kg/m <sup>2</sup> | BMI 18.5-30 kg/m <sup>2</sup> | BMI ≥30 kg/m <sup>2</sup> | All            | BMI <18.5 kg/m <sup>2</sup> | BMI 18.5-30 kg/m <sup>2</sup> | BMI ≥30 kg/m <sup>2</sup> | All            | BMI <18.5 kg/m <sup>2</sup> | BMI 18.5-30 kg/m <sup>2</sup> | BMI ≥30 kg/m <sup>2</sup> | All            |
| Subjects, n (%)   | 1413 (2)                    | 38280 (64)                    | 19823 (33)                | 59516 (100)    | 93 (3)                      | 2210 (67)                     | 975 (30)                  | 3278 (100)     | 38 (3)                      | 995 (71)                      | 373 (27)                  | 1406 (100)     |
| Events, n (%)     | 186 (13.2)                  | 3137 (8.2)                    | 1290 (6.5)                | 4613 (7.8)     | 15 (16.1)                   | 211 (9.5)                     | 82 (8.4)                  | 308 (9.4)      | 6 (15.8)                    | 111 (11.2)                    | 34 (9.1)                  | 151 (10.7)     |
| Female sex, n (%) | 1012 (72)                   | 17964 (47)                    | 9767 (49)                 | 28743 (48)     | 46 (50)                     | 751 (34)                      | 374 (38)                  | 1171 (36)      | 26 (68)                     | 470 (47)                      | 189 (51)                  | 685 (49)       |
| Age, years        | 68 [39-81]                  | 66 [51-77]                    | 64 [52-73]                | 65 [52-76]     | 60 [39-79]                  | 63 [46-75]                    | 60 [48-69]                | 62 [47-74]     | 50 [26-70]                  | 56 [36-75]                    | 61 [45-72]                | 57 [38-74]     |
| Follow-up, years  | 5.6 [2.0-8.2]               | 7.2 [5.1-11.2]                | 7.2 [5.3-10.6]            | 7.1 [5.2-11]   | 6.6 [3.2-9.4]               | 7 [4.7-9.6]                   | 7.2 [5.5-9.7]             | 7 [5.1-9.6]    | 5.8 [2.5-7]                 | 6.1 [3.7-7.5]                 | 6 [5.0-7.6]               | 6 [4.1-7.5]    |
|                   | LA area                     |                               |                           |                | LA diameter                 |                               |                           |                | LA volume                   |                               |                           |                |
|                   | BMI <18.5 kg/m <sup>2</sup> | BMI 18.5-30 kg/m <sup>2</sup> | BMI ≥30 kg/m <sup>2</sup> | All            | BMI <18.5 kg/m <sup>2</sup> | BMI 18.5-30 kg/m <sup>2</sup> | BMI ≥30 kg/m <sup>2</sup> | All            | BMI <18.5 kg/m <sup>2</sup> | BMI 18.5-30 kg/m <sup>2</sup> | BMI ≥30 kg/m <sup>2</sup> | All            |
| Subjects, n (%)   | 2259 (2)                    | 58597 (65)                    | 29740 (33)                | 90596 (100)    | 2315 (3)                    | 59425 (66)                    | 27713 (31)                | 89453 (100)    | 3314 (2)                    | 101920 (68)                   | 45306 (30)                | 150540 (100)   |
| Events, n (%)     | 302 (13.4)                  | 4901 (8.4)                    | 1996 (6.7)                | 7199 (7.9)     | 227 (9.8)                   | 4137 (7.0)                    | 1542 (5.6)                | 5906 (6.6)     | 455 (13.7)                  | 6924 (6.8)                    | 2214 (4.9)                | 9593 (6.4)     |
| Female sex, n (%) | 1573 (70)                   | 26390 (45)                    | 14269 (48)                | 42232 (47)     | 1572 (68)                   | 28680 (48)                    | 14384 (52)                | 44636 (50)     | 2410 (73)                   | 47765 (47)                    | 22504 (50)                | 72679 (48)     |
| Age, years        | 67 [39-81]                  | 66 [51-77]                    | 63 [52-72]                | 65 [51-76]     | 63 [35-78]                  | 63 [47-75]                    | 62 [51-71]                | 63 [49-74]     | 71 [45-83]                  | 65 [51-77]                    | 62 [52-72]                | 64 [51-76]     |
| Follow-up, years  | 5.4 [1.7-9]                 | 7.4 [5.10.8]                  | 7.6 [5.3-10.5]            | 7.4 [5.1-10.6] | 6.6 [2.6-11]                | 8.4 [5.4-12.7]                | 8.2 [5.6-11.8]            | 8.3 [5.5-12.4] | 5.7 [2-8.8]                 | 7.6 [5.4-10.3]                | 7.9 [5.7-10.4]            | 7.7 [5.5-10.3] |
|                   | LV end-diastolic diameter   |                               |                           |                | LV end-diastolic volume     |                               |                           |                | IVS thickness               |                               |                           |                |
|                   | BMI <18.5 kg/m <sup>2</sup> | BMI 18.5-30 kg/m <sup>2</sup> | BMI ≥30 kg/m <sup>2</sup> | All            | BMI <18.5 kg/m <sup>2</sup> | BMI 18.5-30 kg/m <sup>2</sup> | BMI ≥30 kg/m <sup>2</sup> | All            | BMI <18.5 kg/m <sup>2</sup> | BMI 18.5-30 kg/m <sup>2</sup> | BMI ≥30 kg/m <sup>2</sup> | All            |
| Subjects, n (%)   | 6375 (3)                    | 155211 (67)                   | 68523 (30)                | 230109 (100)   | 1385 (2)                    | 46330 (72)                    | 16305 (25)                | 64020 (100)    | 6468 (3)                    | 157507 (68)                   | 69270 (30)                | 233245 (100)   |
| Events, n (%)     | 673 (10.6)                  | 10938 (7.0)                   | 3684 (5.4)                | 15295 (6.6)    | 177 (12.8)                  | 2889 (6.2)                    | 668 (4.1)                 | 3734 (5.8)     | 677 (10.5)                  | 11160 (7.1)                   | 3722 (5.4)                | 15559 (6.7)    |
| Female sex, n (%) | 4287 (67)                   | 72233 (47)                    | 34031 (50)                | 110551 (48)    | 1037 (75)                   | 21691 (47)                    | 8268 (51)                 | 30996 (48)     | 4361 (67)                   | 73126 (46)                    | 34398 (50)                | 111885 (48)    |
| Age, years        | 66 [42-80]                  | 64 [49-76]                    | 62 [51-71]                | 63 [50-75]     | 73 [47-84]                  | 65 [50-77]                    | 62 [51-72]                | 64 [50-76]     | 66 [42-80]                  | 64 [49-76]                    | 62 [51-71]                | 63 [50-75]     |
| Follow-up, years  | 6.1 [2.1-9.8]               | 7.3 [5.2-10.6]                | 7.4 [5.5-10.4]            | 7.3 [5.3-10.5] | 5.6 [2.1-8.2]               | 7 [5.4-9.3]                   | 7.2 [5.6-9.3]             | 7 [5.4-9.3]    | 6.1 [2.1-9.8]               | 7.3 [5.2-10.5]                | 7.4 [5.5-10.3]            | 7.3 [5.3-10.4] |

RA = right atrial, RV = right ventricular, RVOT = right ventricular outflow tract, LA = left atrial, LV = left ventricular, IVS = interventricular septum.

**Supplementary table 1.** Subject characteristics for patients with available follow-up data for the respective cardiac or aortic measures. RA = right atrial, RV = right ventricular, RVOT = right ventricular outflow tract, LA = left atrial, LV = left ventricular, IVS = interventricular septum.

|                   | LV mass                     |                               |                           |                | Aortic sinus diameter       |                               |                           |               | Aorta at sinotubular diameter |                               |                           |                |
|-------------------|-----------------------------|-------------------------------|---------------------------|----------------|-----------------------------|-------------------------------|---------------------------|---------------|-------------------------------|-------------------------------|---------------------------|----------------|
|                   | BMI <18.5 kg/m <sup>2</sup> | BMI 18.5-30 kg/m <sup>2</sup> | BMI ≥30 kg/m <sup>2</sup> | All            | BMI <18.5 kg/m <sup>2</sup> | BMI 18.5-30 kg/m <sup>2</sup> | BMI ≥30 kg/m <sup>2</sup> | All           | BMI <18.5 kg/m <sup>2</sup>   | BMI 18.5-30 kg/m <sup>2</sup> | BMI ≥30 kg/m <sup>2</sup> | All            |
| Subjects, n (%)   | 6229 (3)                    | 151563 (68)                   | 66452 (30)                | 224244 (100)   | 2157 (2)                    | 62533 (69)                    | 26115 (29)                | 90805 (100)   | 1334 (2)                      | 39876 (66)                    | 19403 (32)                | 60613 (100)    |
| Events, n (%)     | 650 (10.4)                  | 10583 (7.0)                   | 3521 (5.3)                | 14754 (6.6)    | 284 (13.2)                  | 4237 (6.8)                    | 1244 (4.8)                | 5765 (6.3)    | 199 (14.9)                    | 3189 (8.0)                    | 1128 (5.8)                | 4516 (7.5)     |
| Female sex, n (%) | 4205 (68)                   | 70812 (47)                    | 33210 (50)                | 108227 (48)    | 1551 (72)                   | 28663 (46)                    | 12599 (48)                | 42813 (47)    | 922 (69)                      | 16624 (42)                    | 8673 (45)                 | 26219 (43)     |
| Age, years        | 66 [42-80]                  | 64 [49-76]                    | 62 [51-71]                | 63 [50-75]     | 72 [45-83]                  | 65 [51-78]                    | 62 [52-72]                | 64 [51-76]    | 72 [45-83]                    | 68 [54-78]                    | 64 [54-73]                | 67 [54-77]     |
| Follow-up, years  | 6.1 [2.1-9.9]               | 7.3 [5.2-10.6]                | 7.4 [5.5-10.3]            | 7.3 [5.3-10.5] | 5.7 [1.8-8.4]               | 7.5 [5.4-9.7]                 | 7.6 [5.7-9.6]             | 7.5 [5.4-9.7] | 5.5 [1.6-8.6]                 | 7.7 [5.2-10.6]                | 7.8 [5.7-10.5]            | 7.7 [5.3-10.5] |
|                   | Aortic root diameter        |                               |                           |                | Ascending aorta diameter    |                               |                           |               | Aortic arch diameter          |                               |                           |                |
|                   | BMI <18.5 kg/m <sup>2</sup> | BMI 18.5-30 kg/m <sup>2</sup> | BMI ≥30 kg/m <sup>2</sup> | All            | BMI <18.5 kg/m <sup>2</sup> | BMI 18.5-30 kg/m <sup>2</sup> | BMI ≥30 kg/m <sup>2</sup> | All           | BMI <18.5 kg/m <sup>2</sup>   | BMI 18.5-30 kg/m <sup>2</sup> | BMI ≥30 kg/m <sup>2</sup> | All            |
| Subjects, n (%)   | 4773 (2)                    | 133153 (68)                   | 57212 (29)                | 195138 (100)   | 2693 (3)                    | 65077 (64)                    | 33619 (33)                | 101389 (100)  | 454 (3)                       | 10988 (65)                    | 5405 (32)                 | 16847 (100)    |
| Events, n (%)     | 541 (11.3)                  | 8971 (6.7)                    | 2844 (5.0)                | 12356 (6.3)    | 295 (11.0)                  | 5587 (8.6)                    | 2252 (6.7)                | 8134 (8.0)    | 43 (9.5)                      | 803 (7.3)                     | 312 (5.8)                 | 1158 (6.9)     |
| Female sex, n (%) | 3272 (69)                   | 62640 (47)                    | 28806 (50)                | 94718 (49)     | 1770 (66)                   | 28766 (44)                    | 15877 (47)                | 46413 (46)    | 303 (67)                      | 4667 (43)                     | 2393 (44)                 | 7363 (44)      |
| Age, years        | 68 [41-81]                  | 64 [49-76]                    | 62 [51-71]                | 63 [50-75]     | 66 [43-80]                  | 67 [52-78]                    | 63 [53-73]                | 65 [52-76]    | 52 [26-77]                    | 64 [47-76]                    | 61 [50-70]                | 63 [48-74]     |
| Follow-up, years  | 5.9 [2.1-9.6]               | 7.6 [5.4-11]                  | 7.7 [5.6-10.7]            | 7.6 [5.4-10.9] | 5.9 [1.9-9.6]               | 6.7 [4.5-9.6]                 | 6.9 [5.2-9.6]             | 6.8 [4.9-9.6] | 5.8 [2.1-8.7]                 | 6.6 [5.2-9]                   | 6.8 [5.3-8.9]             | 6.7 [5.2-9]    |

RA = right atrial, RV = right ventricular, RVOT = right ventricular outflow tract, LA = left atrial, LV = left ventricular, IVS = interventricular septum.
