# Supplementary material for: Prognostic association supports indexing size measures in echocardiography by body surface area
Source: bioRxiv or medRxiv preprint supplement (doi:10.1101/2021.12.09.21267530), 2022-12-21
Supplement: Supplementary file [file media-2.pdf]

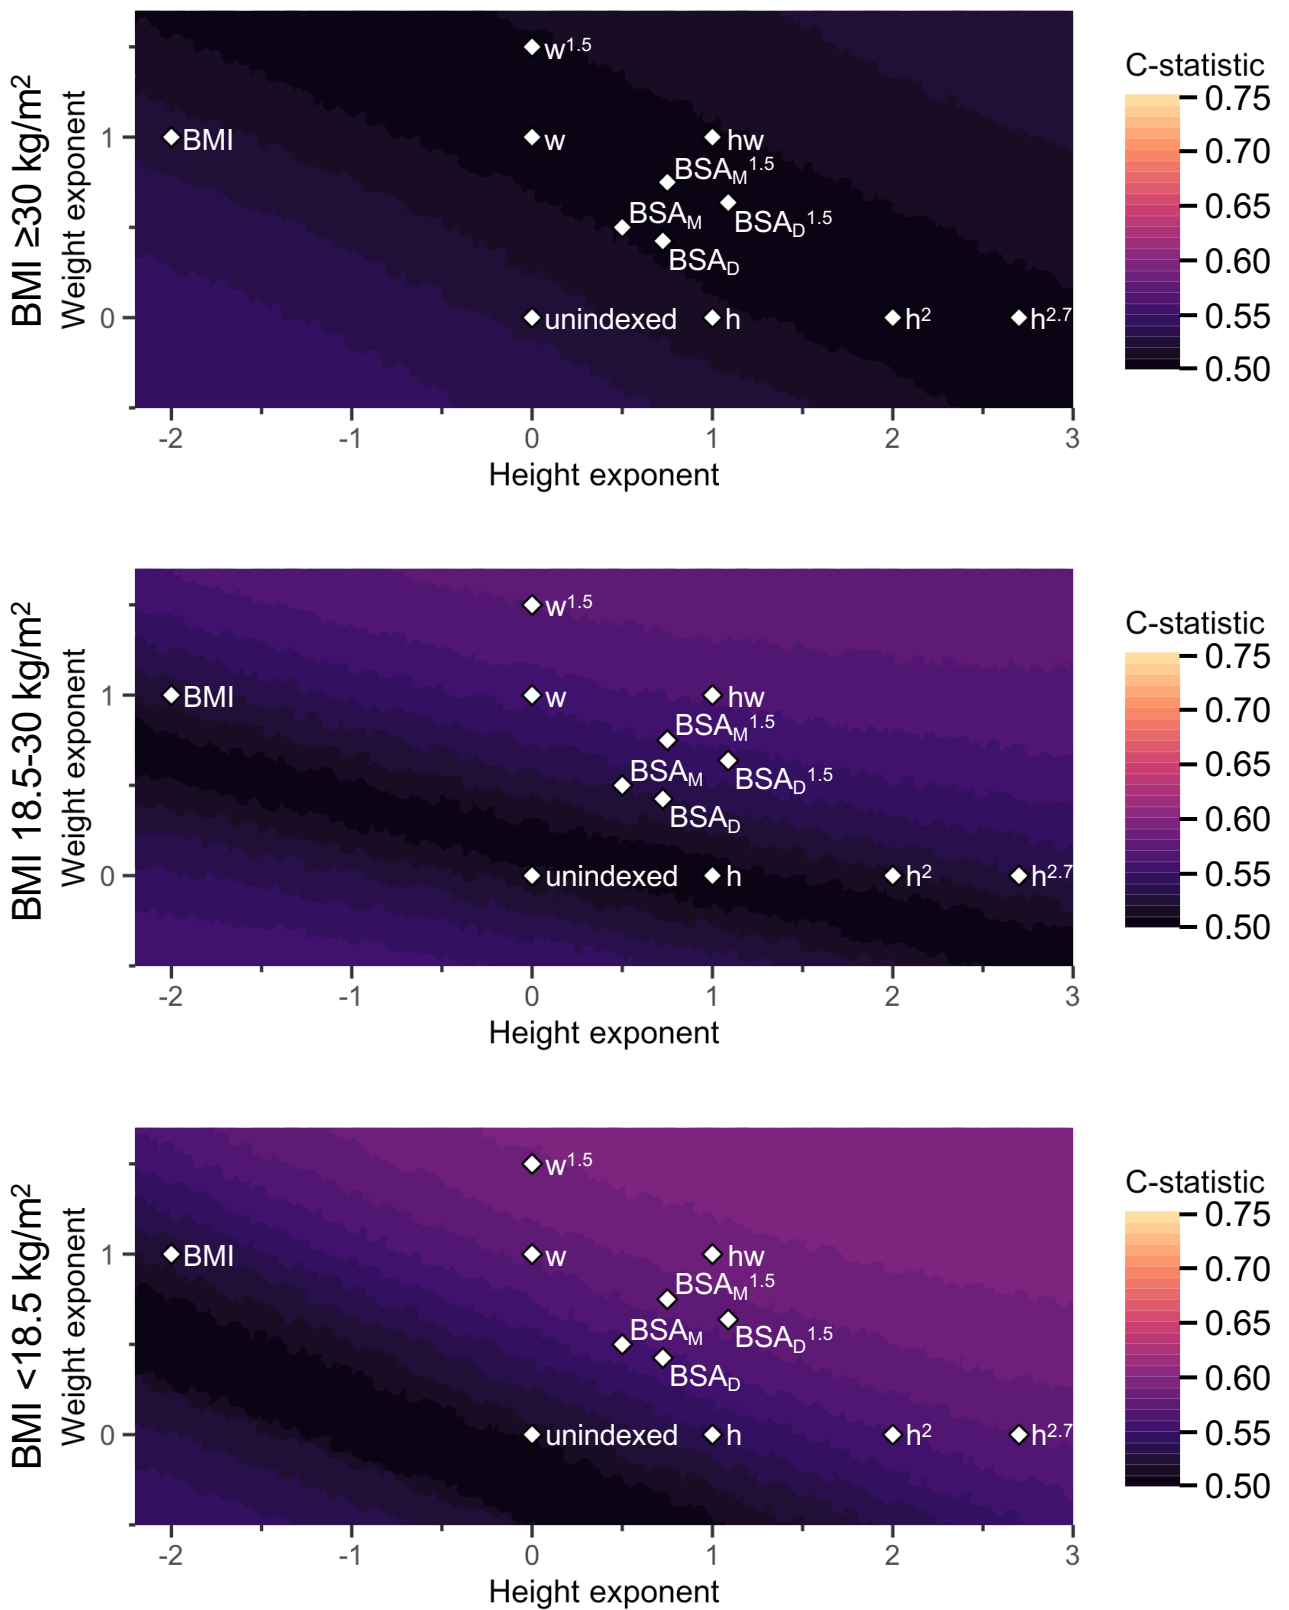

**Supplemental Figure 1.** Average prognostic strength of indexing for body size in aorta at sinotubular diameter.

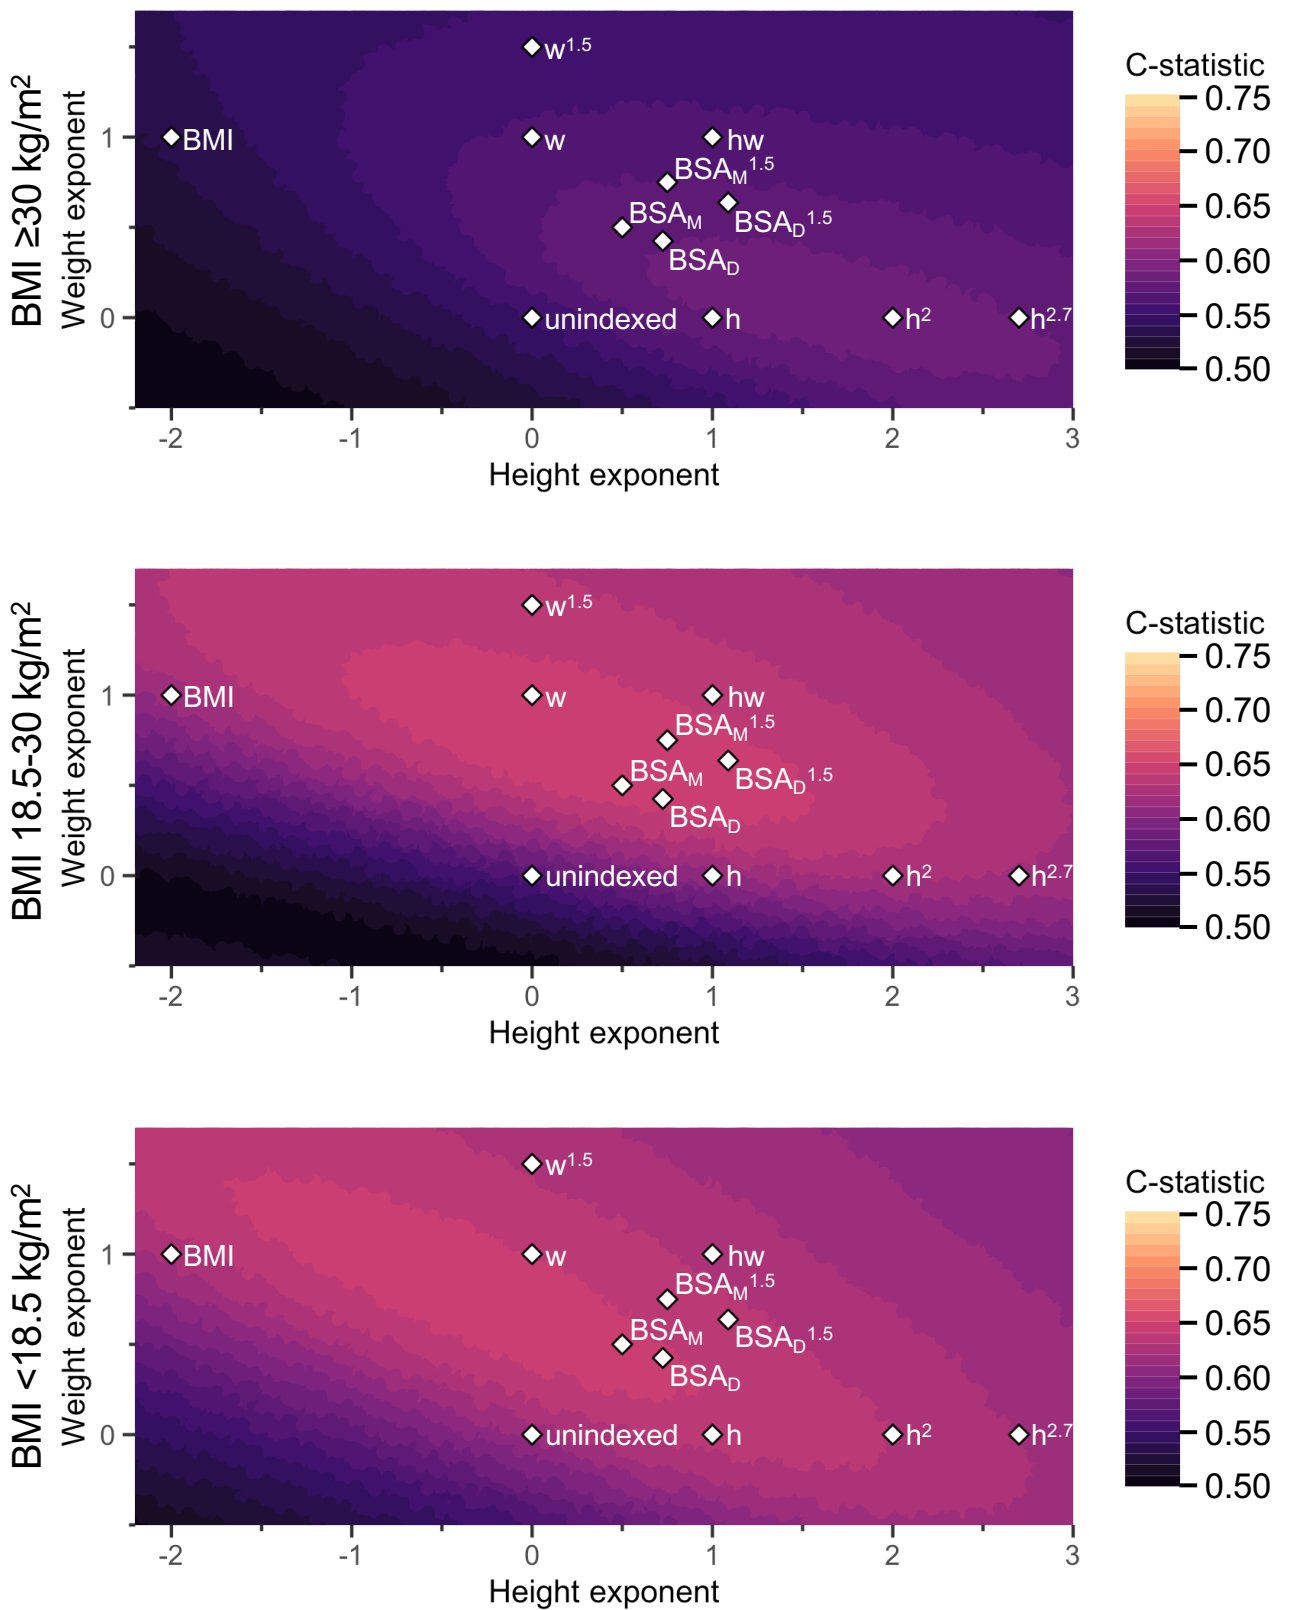

**Supplemental Figure 2.** Average prognostic strength of indexing for body size in aortic sinus diameter.

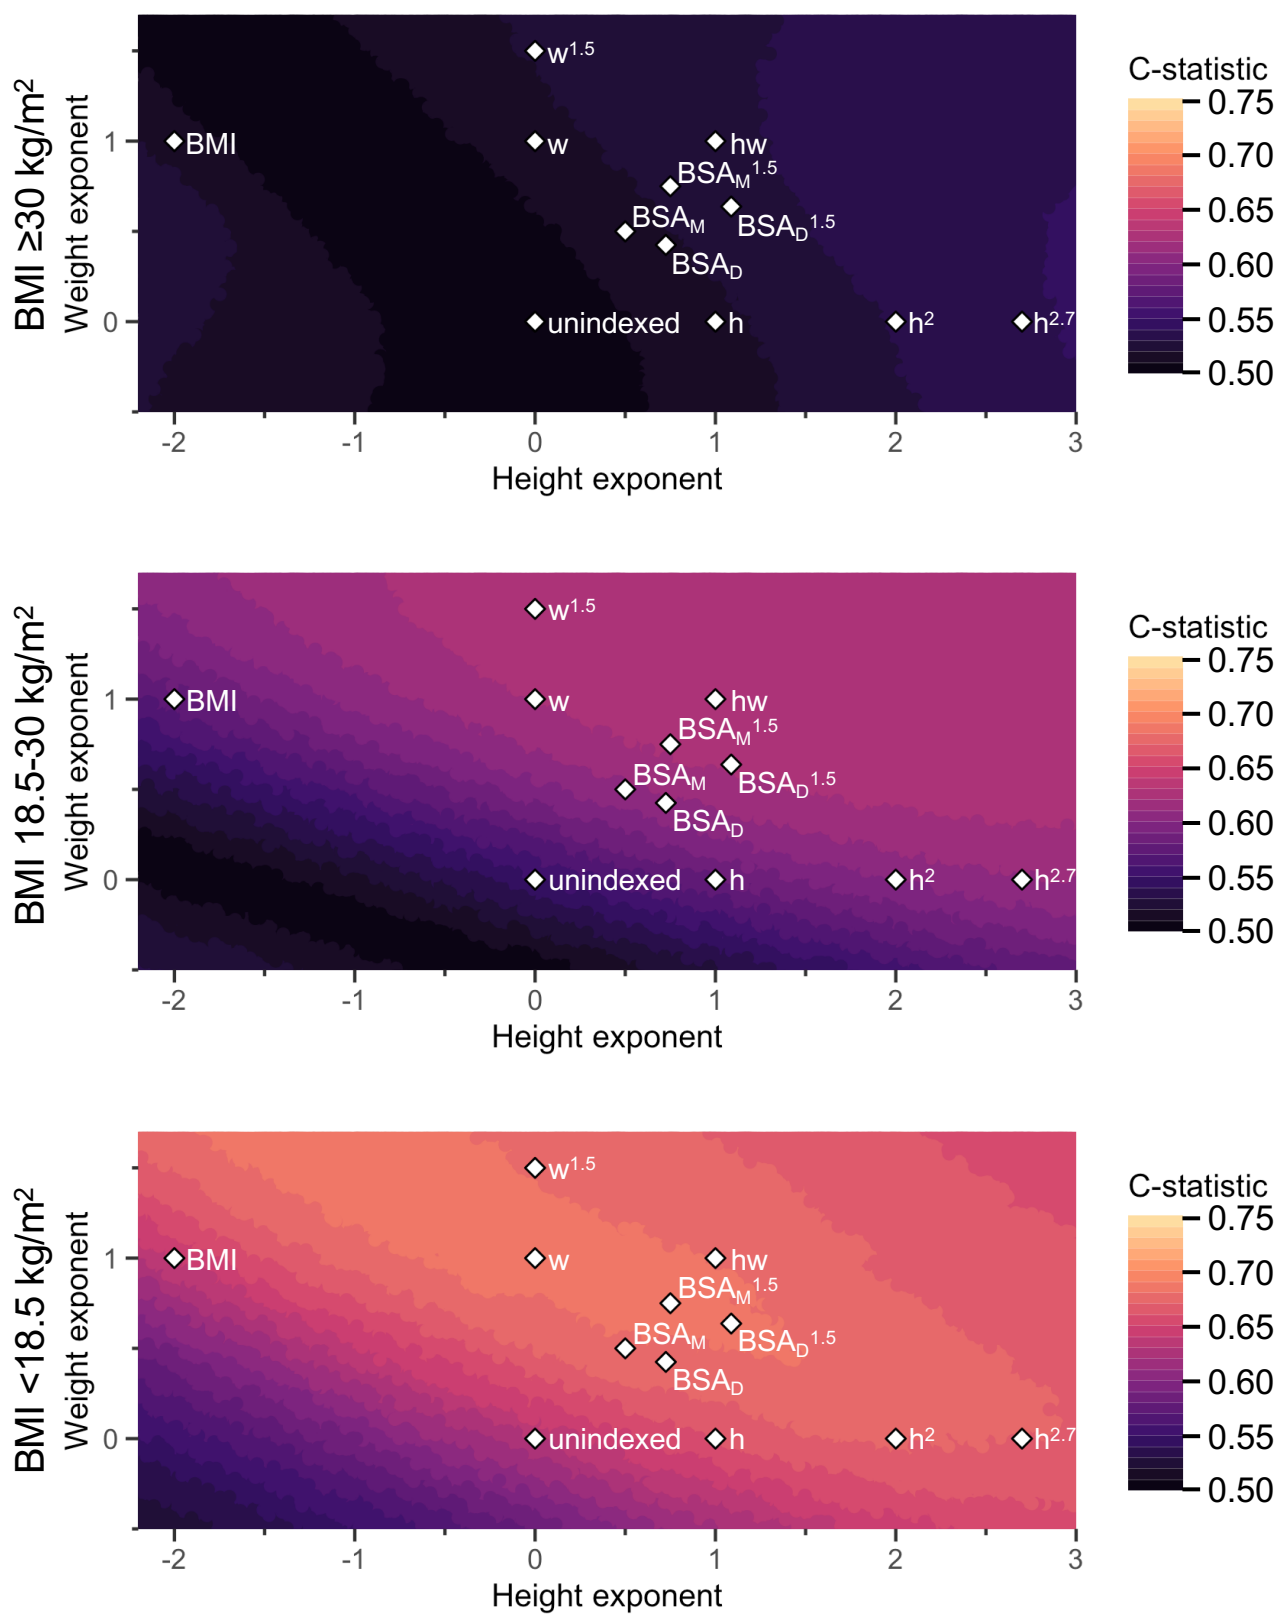

Supplemental Figure 3. Average prognostic strength of indexing for body size in aortic arch diameter.

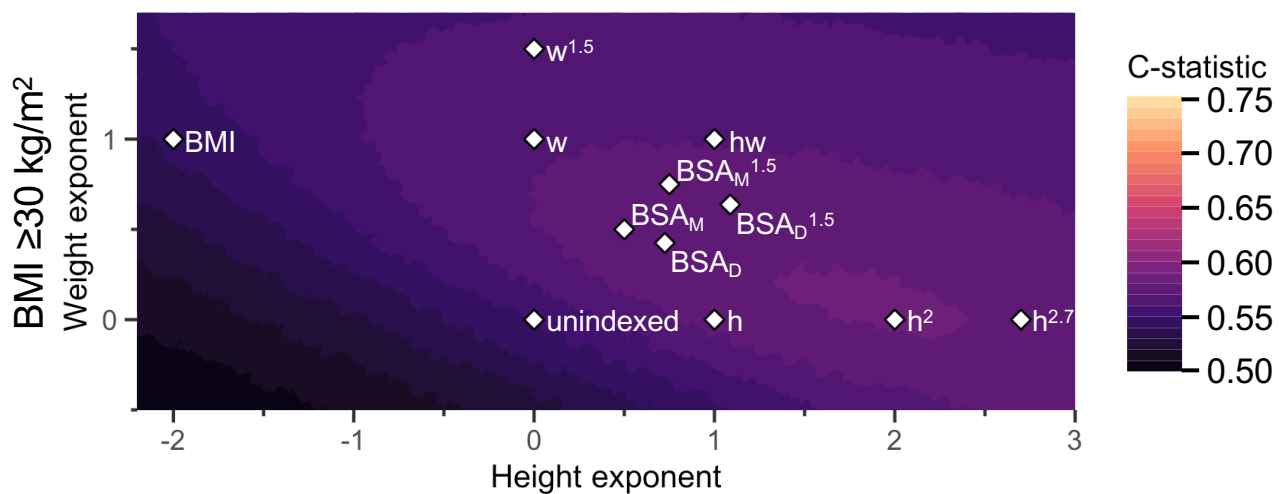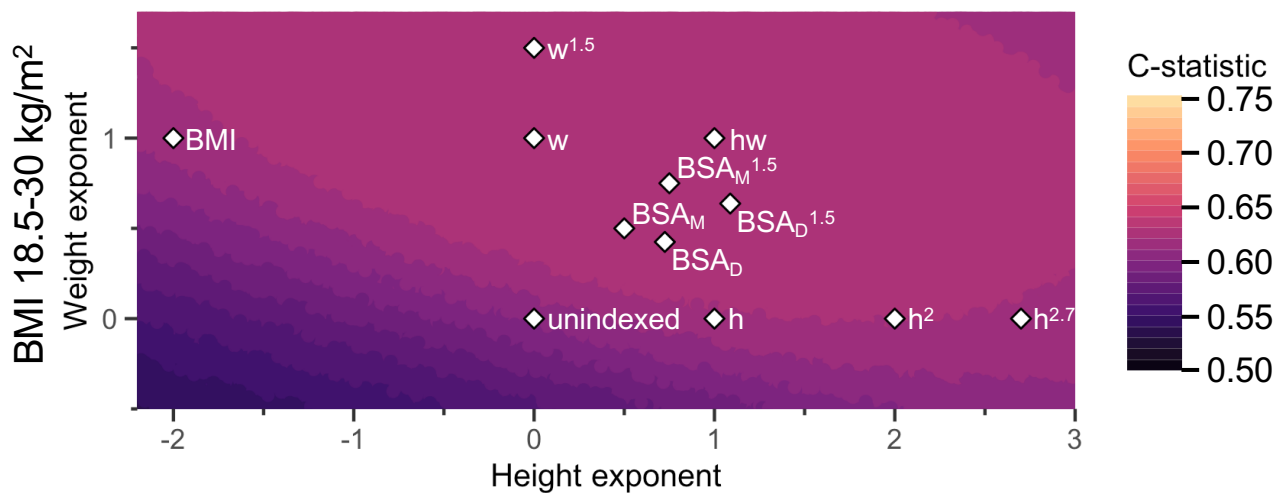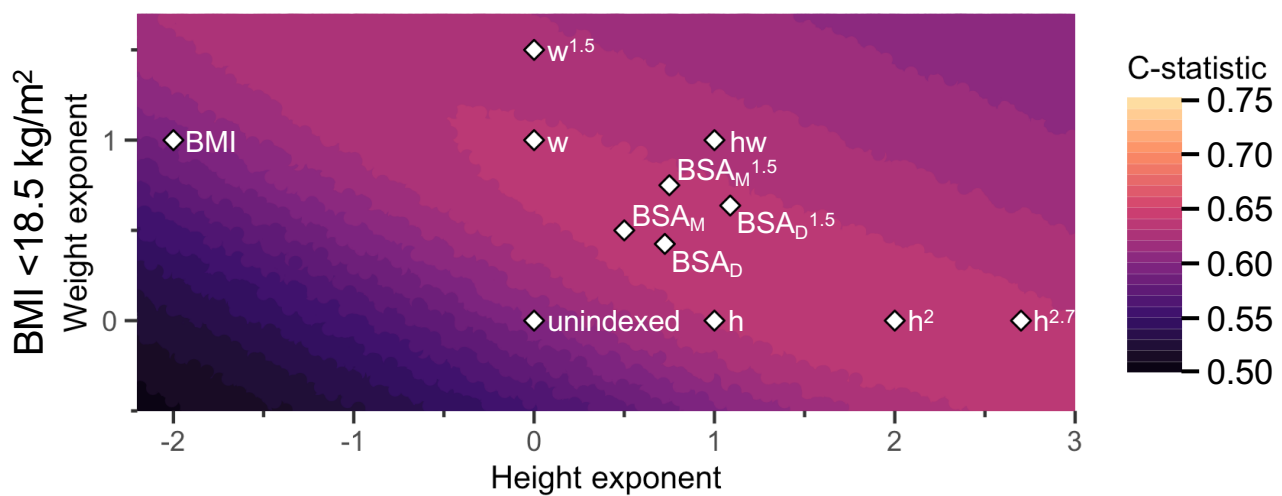

**Supplemental Figure 4.** Average prognostic strength of indexing for body size in aortic root diameter.

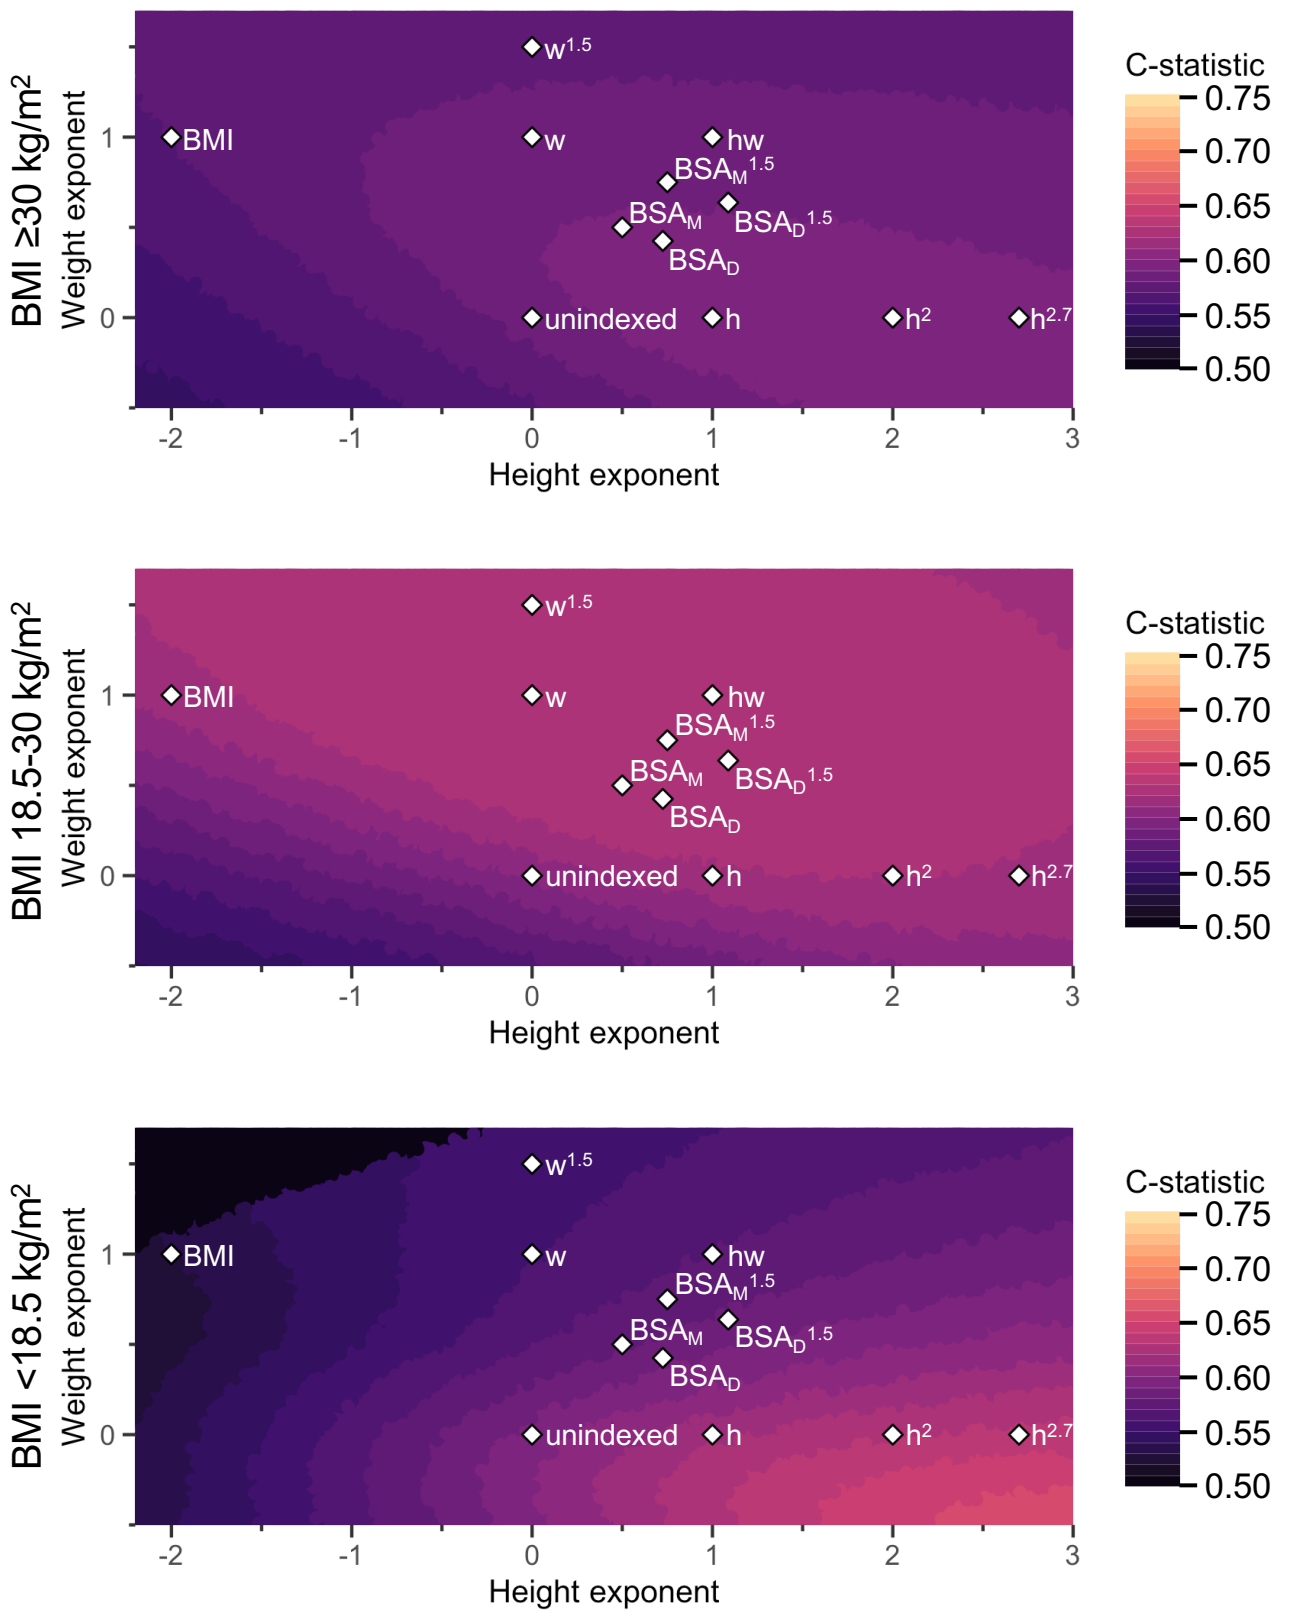

**Supplemental Figure 5.** Average prognostic strength of indexing for body size in ascending aorta diameter.

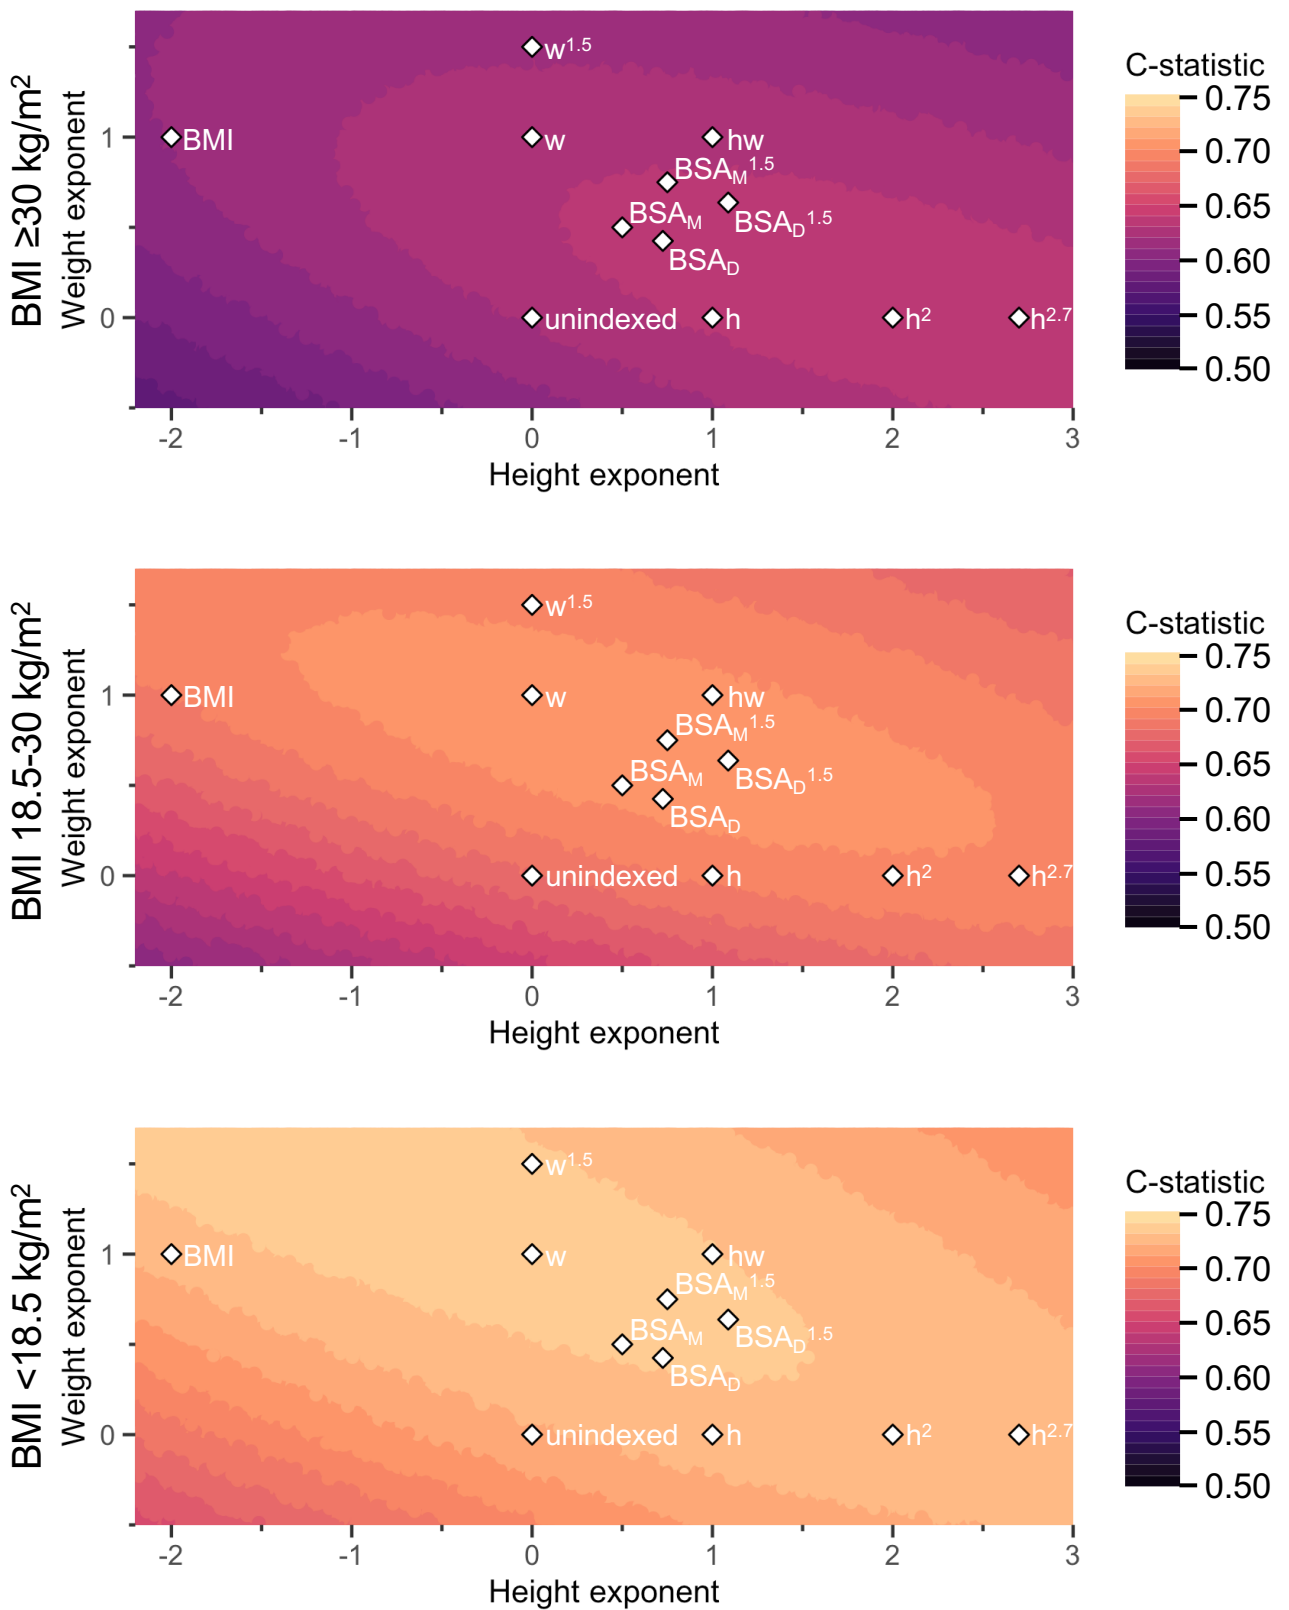

**Supplemental Figure 6.** Average prognostic strength of indexing for body size in LA area.

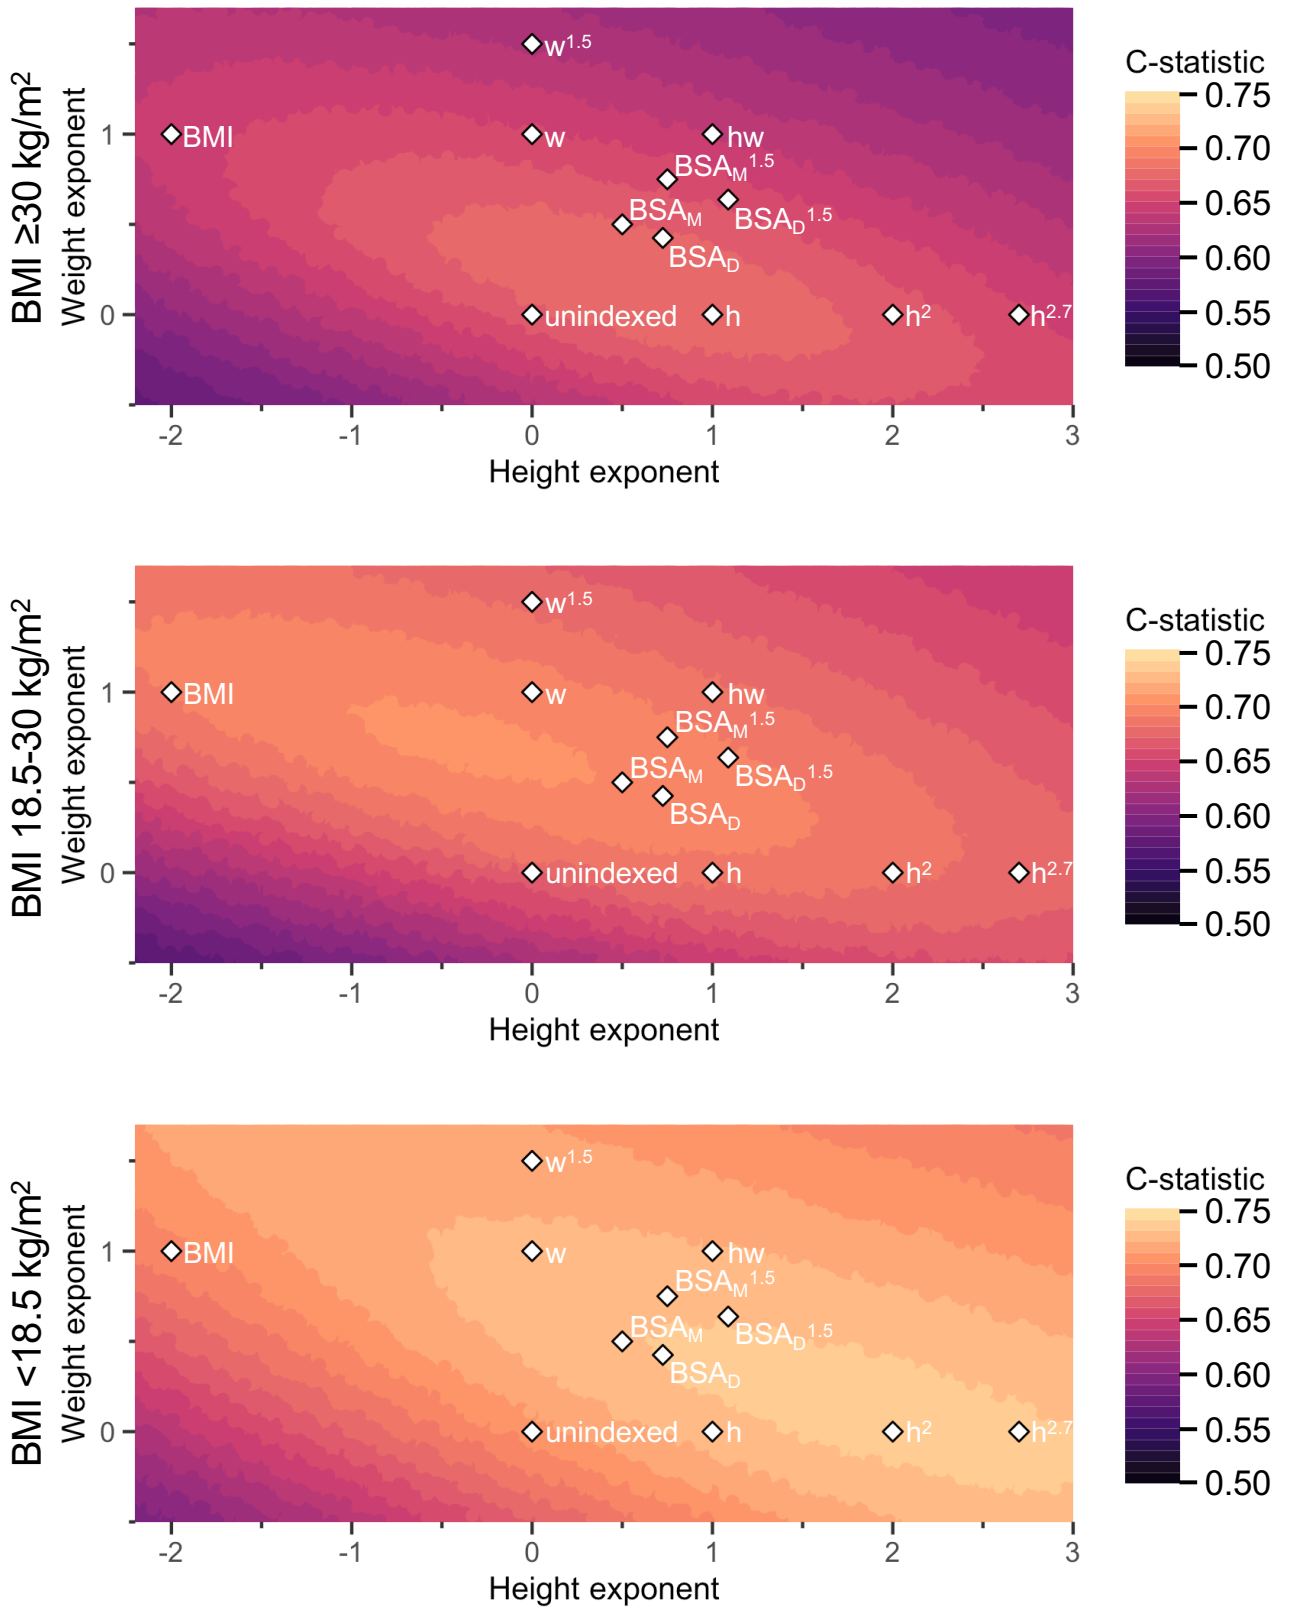

Supplemental Figure 7. Average prognostic strength of indexing for body size in LA diameter.

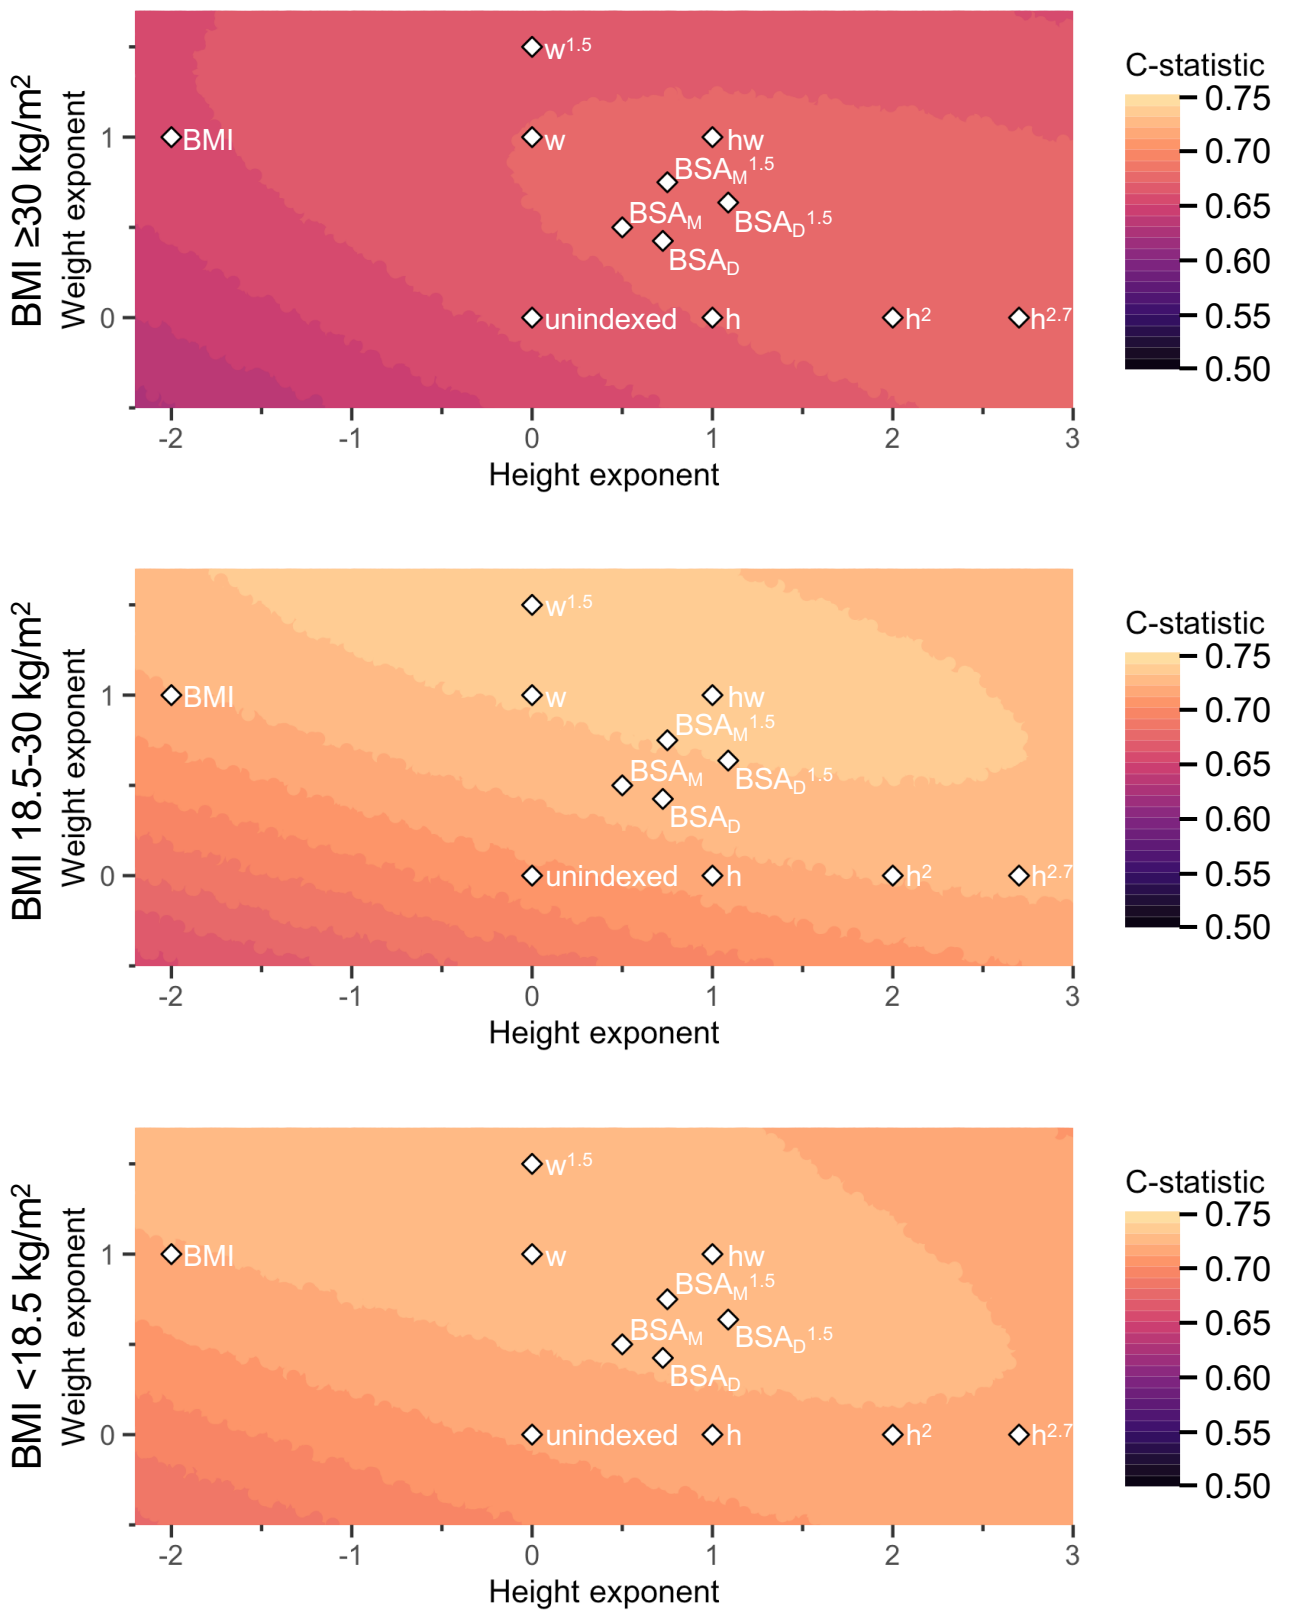

**Supplemental Figure 8.** Average prognostic strength of indexing for body size in LA volume.



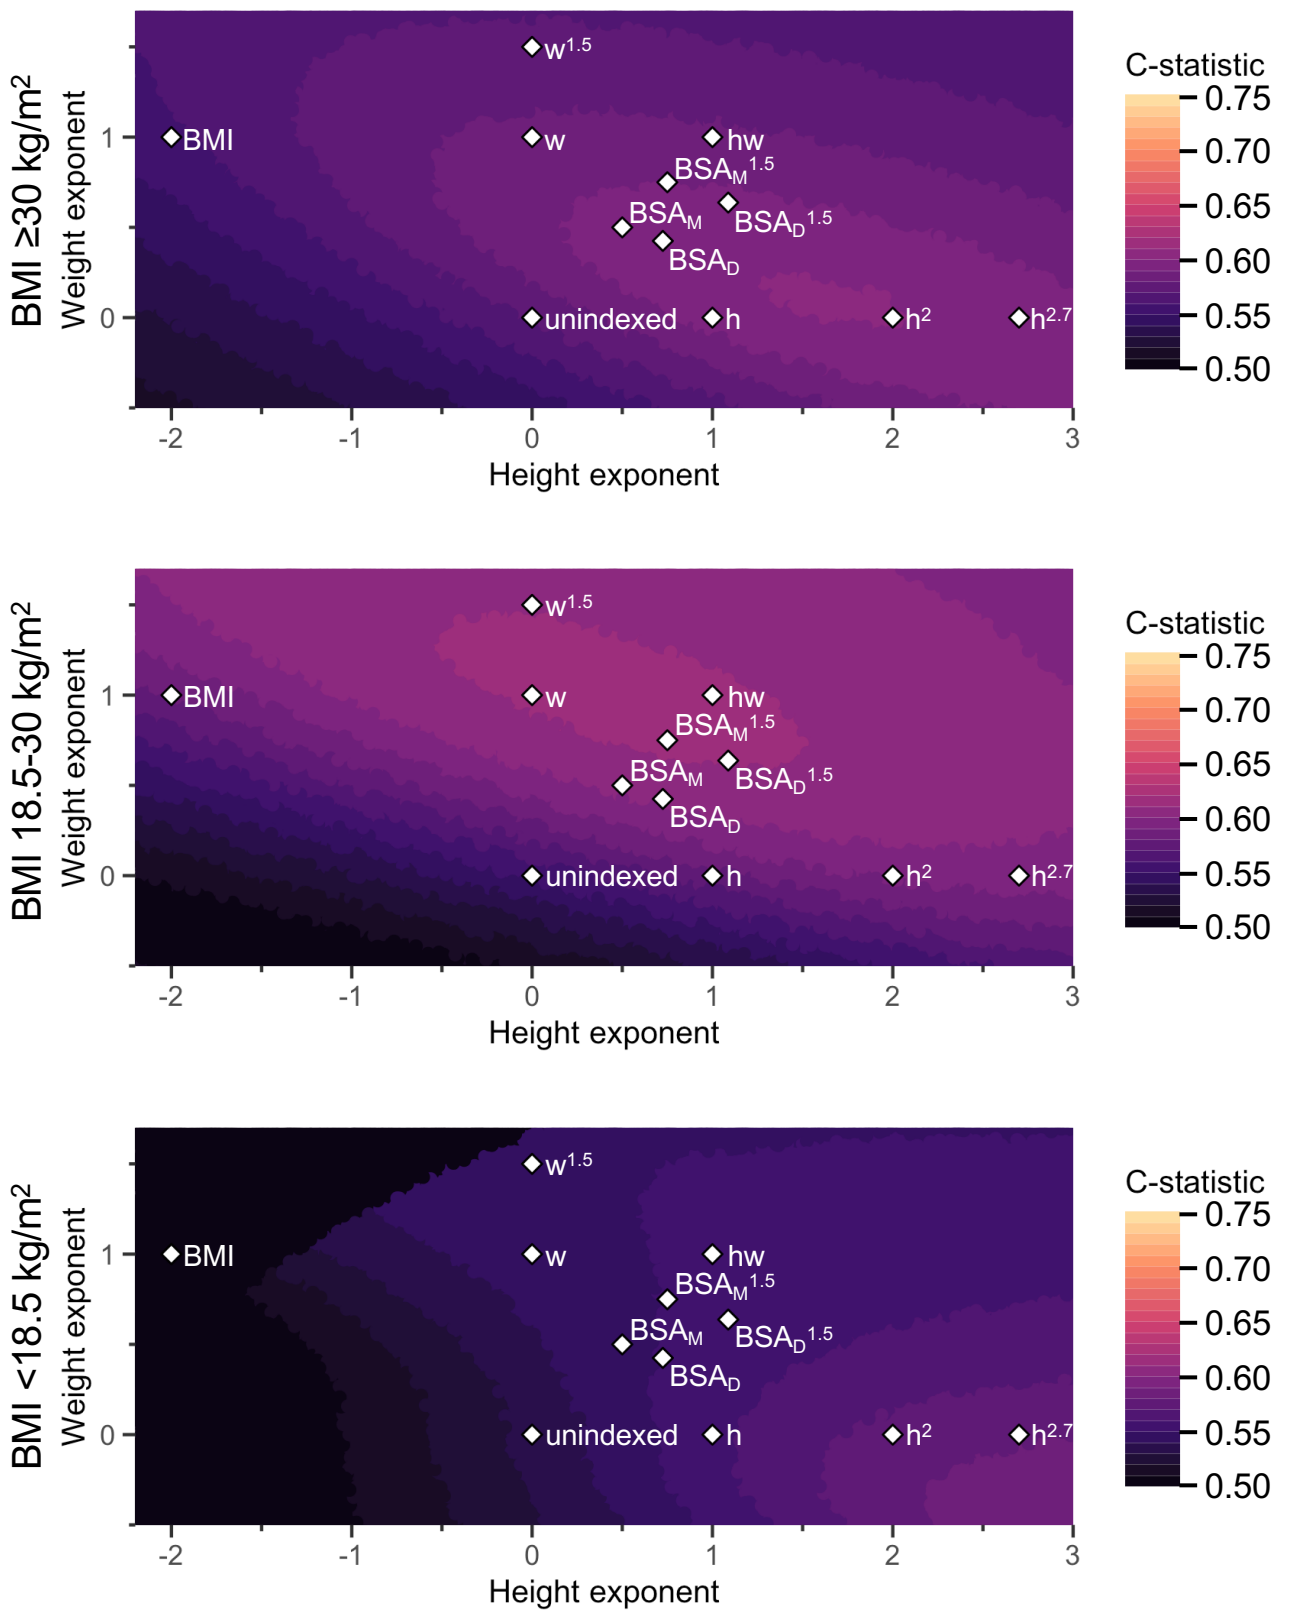

**Supplemental Figure 9.** Average prognostic strength of indexing for body size in LV end-diastolic diameter.

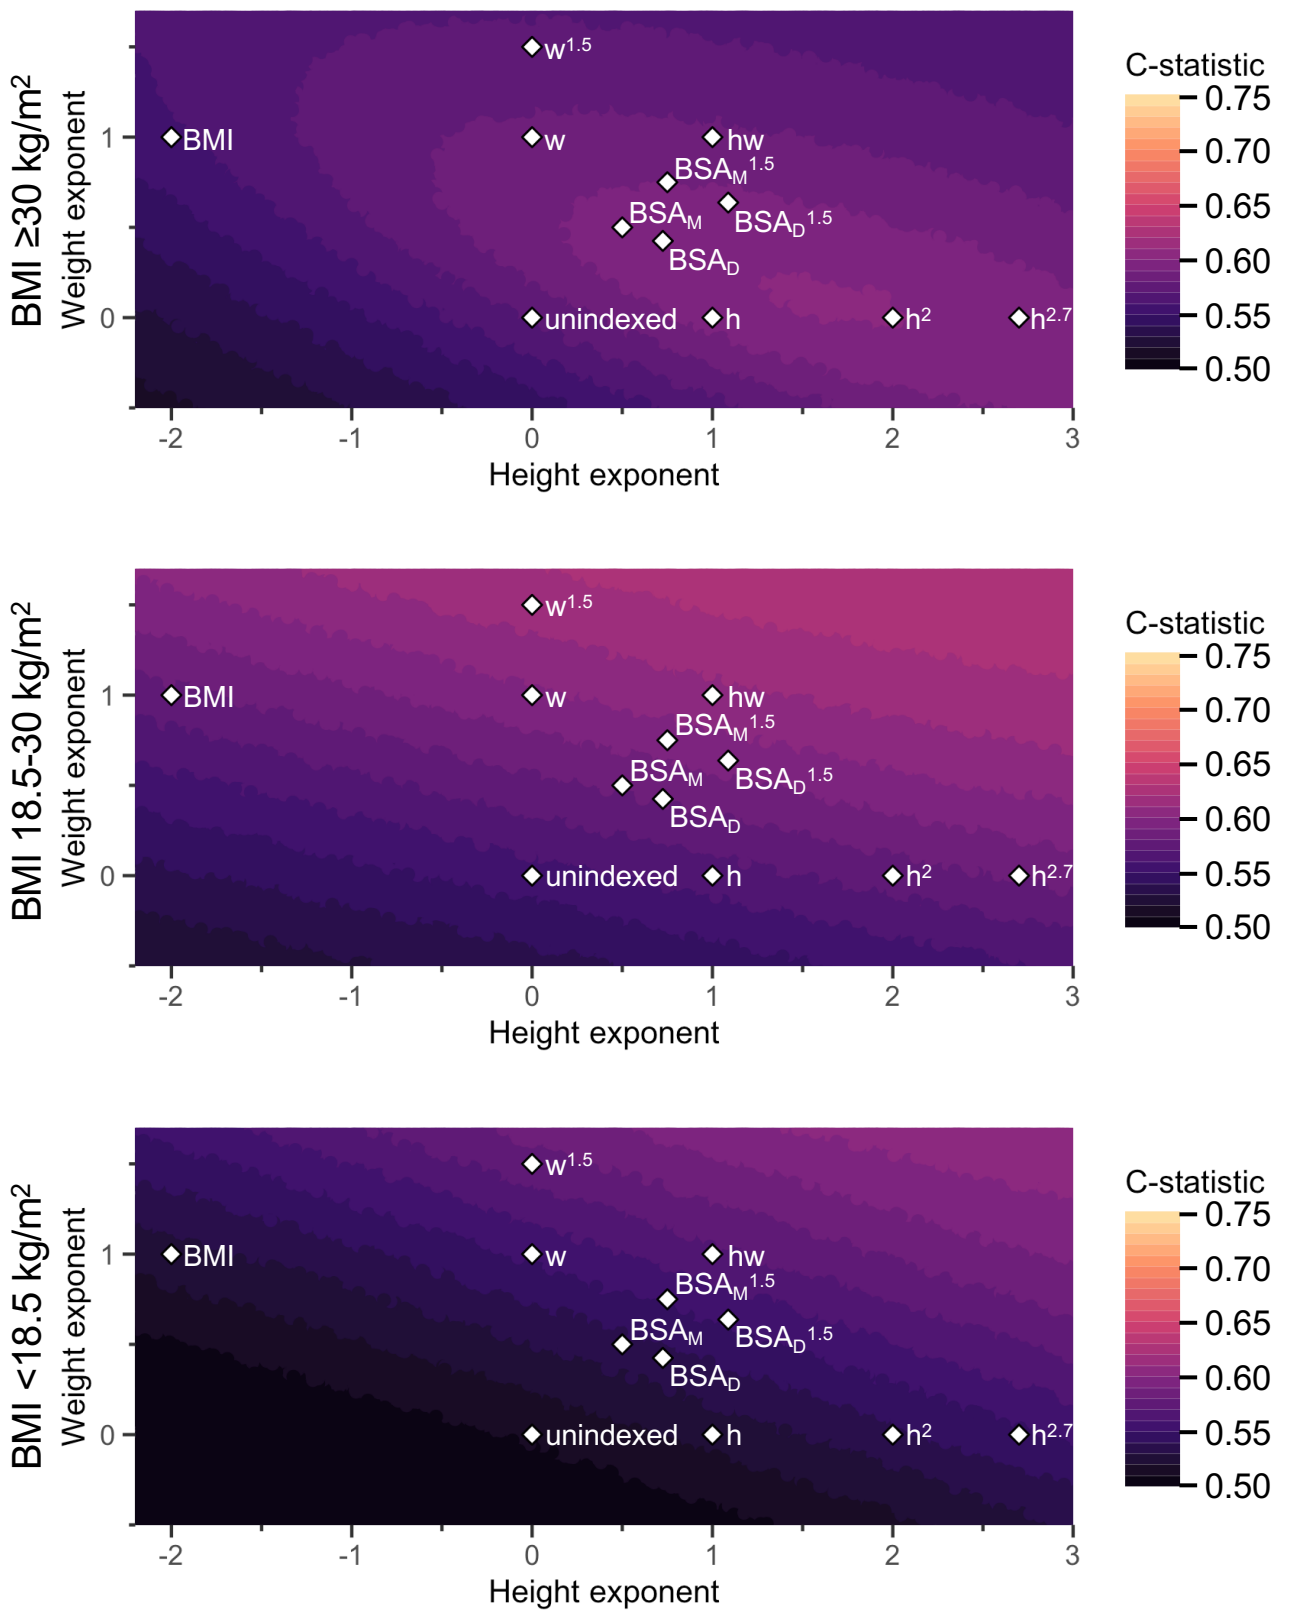

**Supplemental Figure 10.** Average prognostic strength of indexing for body size in LV end-diastolic volume.

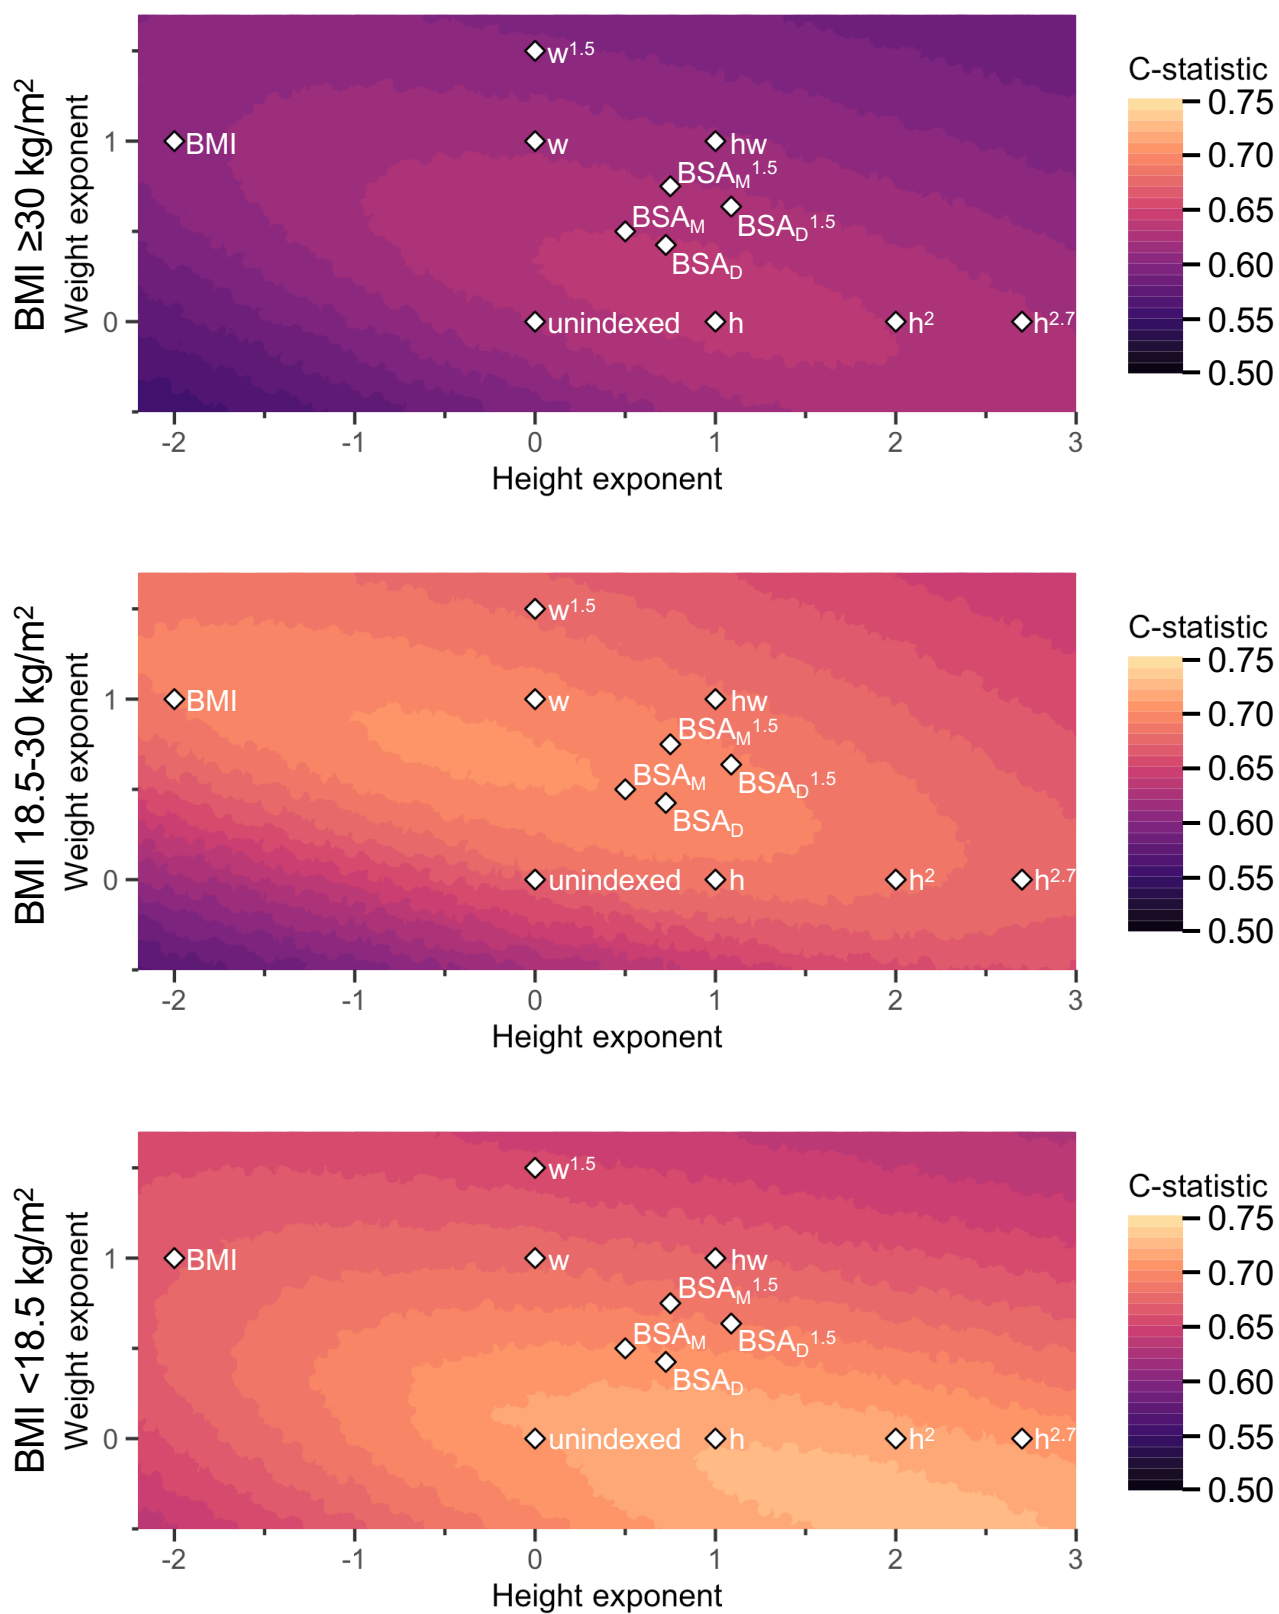

**Supplemental Figure 11.** Average prognostic strength of indexing for body size in IVS thickness.

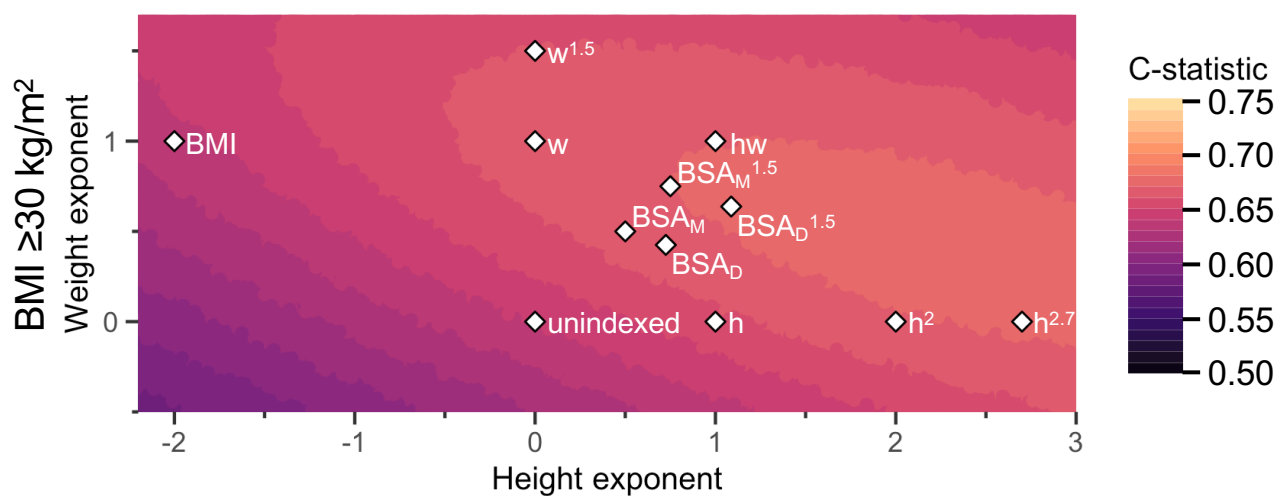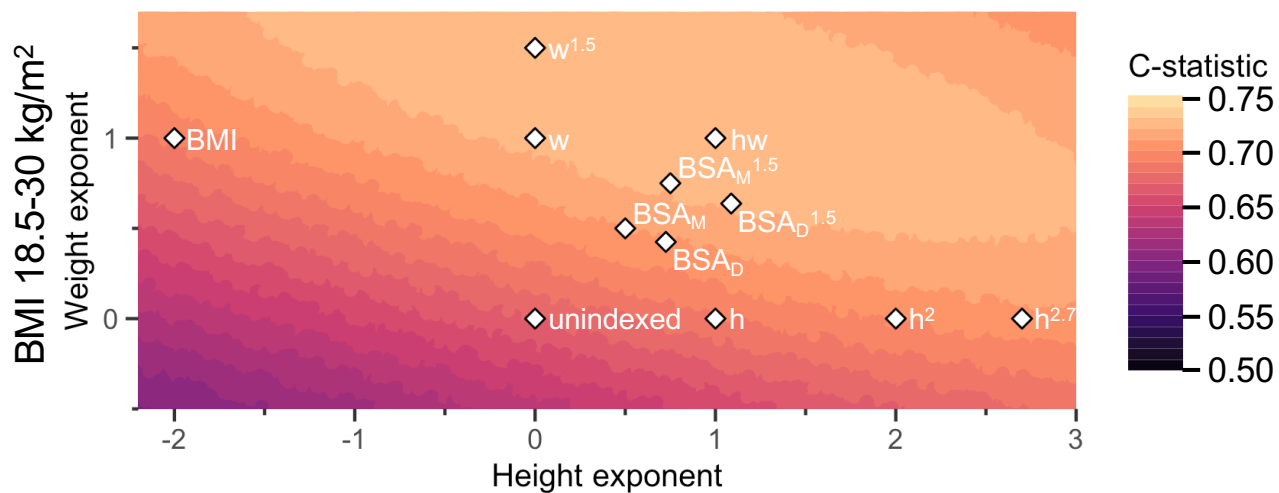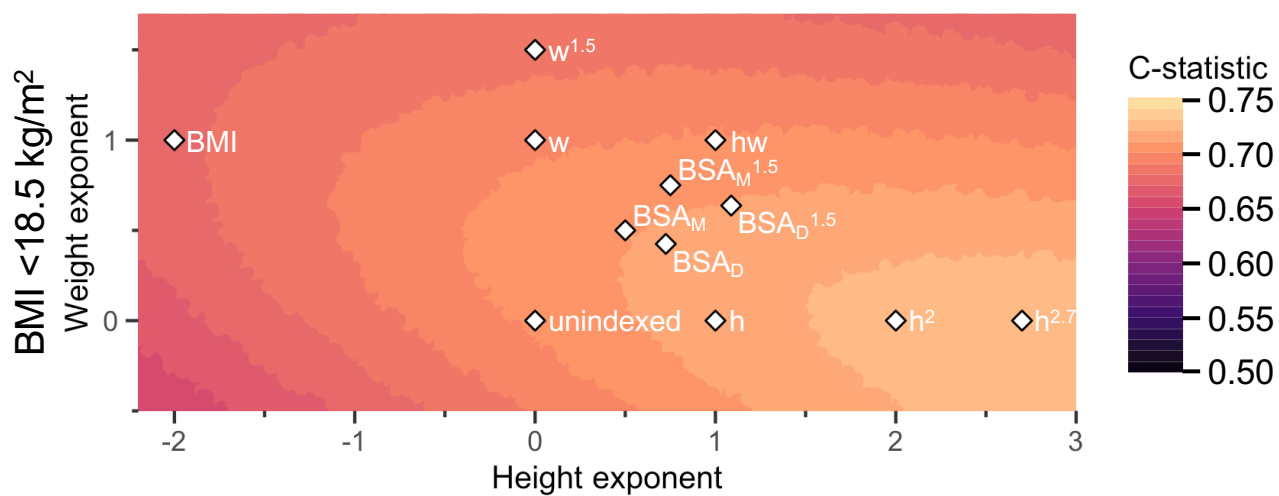

**Supplemental Figure 12.** Average prognostic strength of indexing for body size in LV mass.

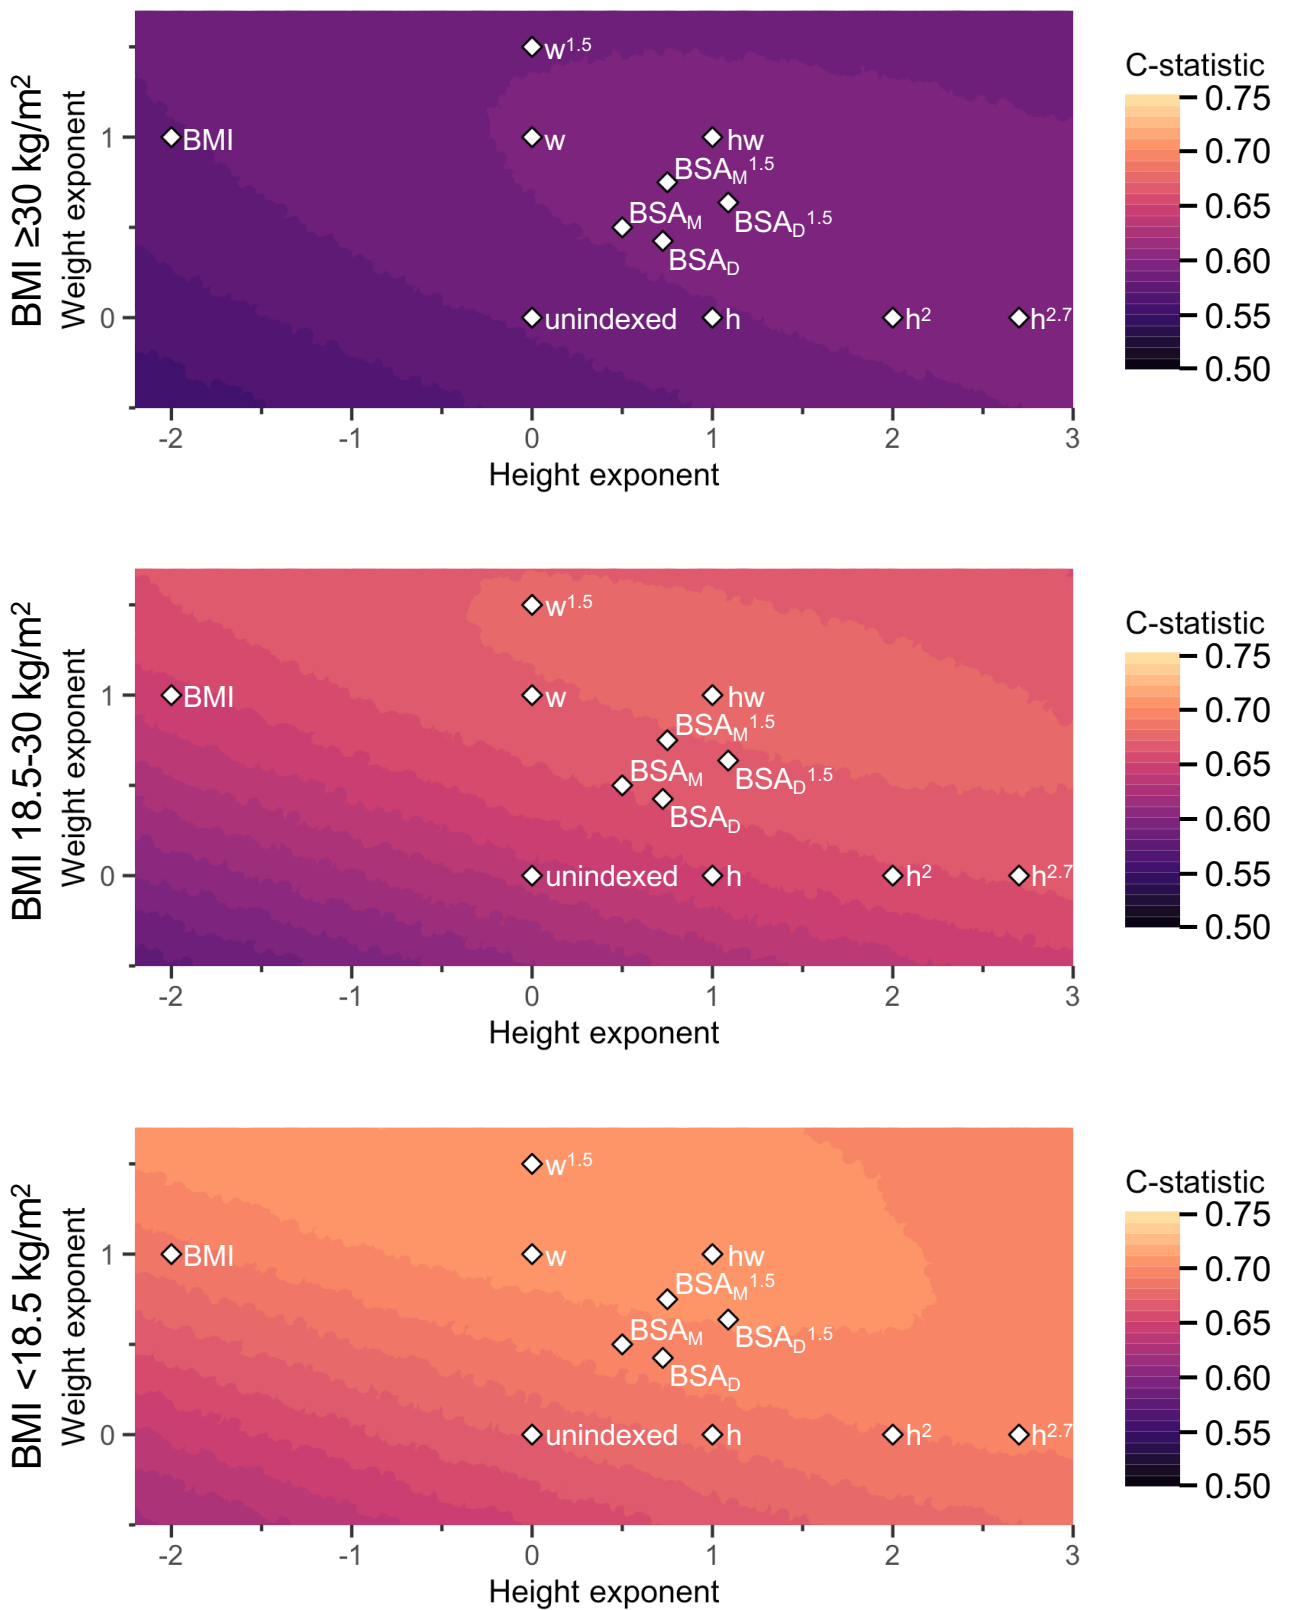

Supplemental Figure 13. Average prognostic strength of indexing for body size in RA area.

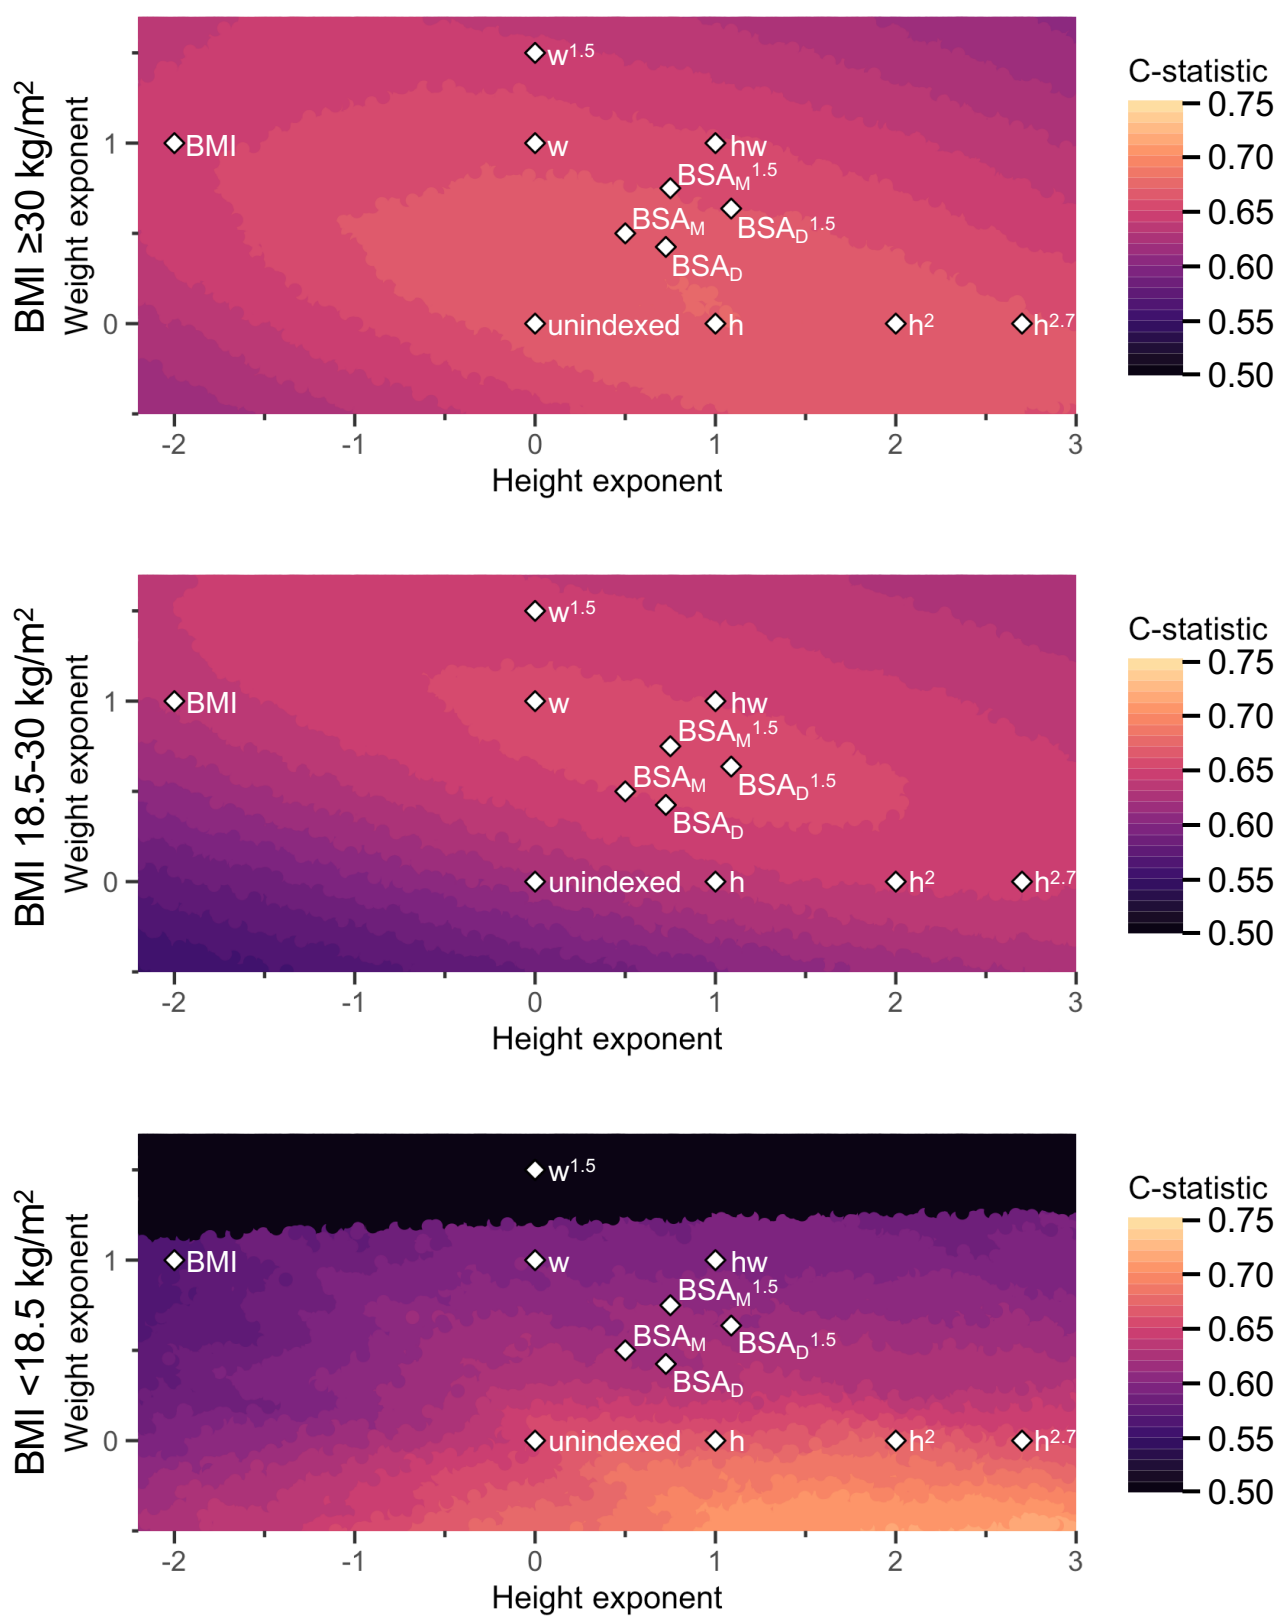

**Supplemental Figure 14.** Average prognostic strength of indexing for body size in RV diameter. Visual artifact present in BMI <18.5 kg/m<sup>2</sup> due to small population size (n=93).

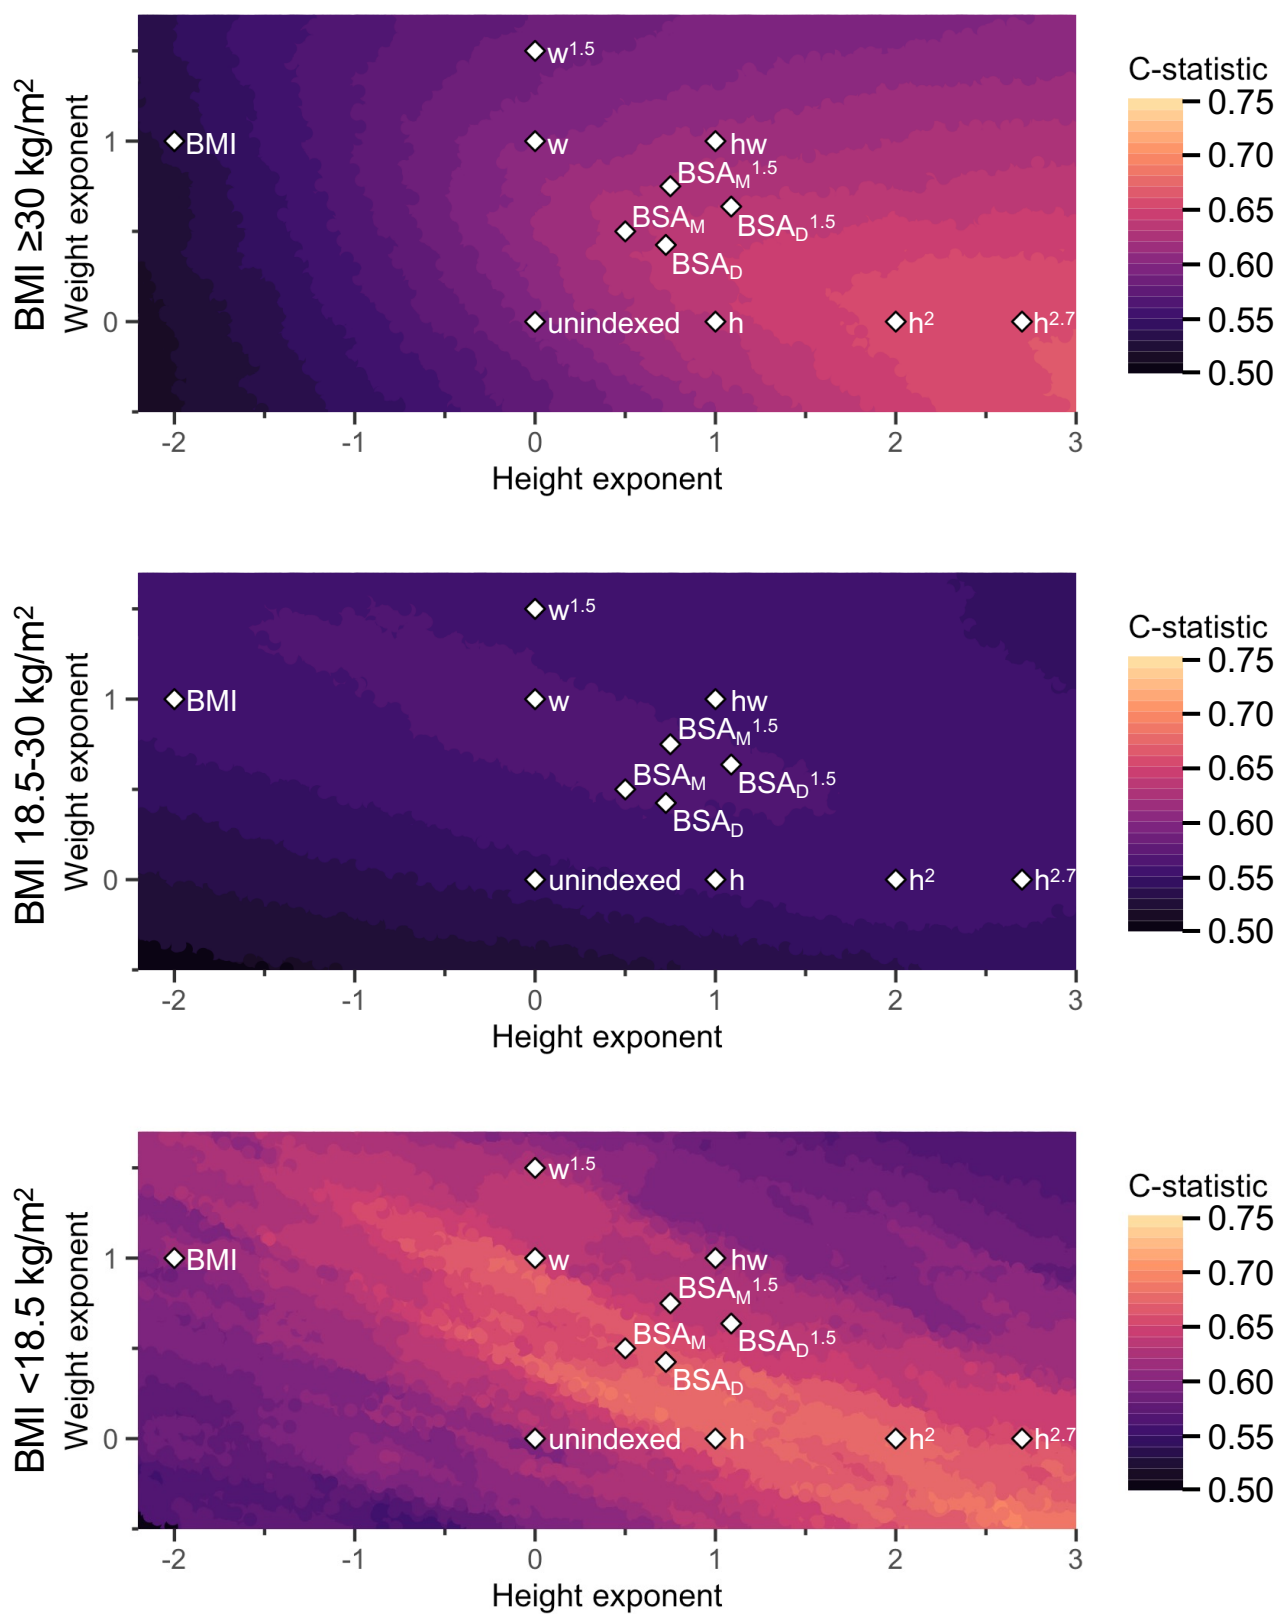

**Supplemental Figure 15.** Average prognostic strength of indexing for body size in RVOT diameter. Visual artifact present in BMI <18.5 kg/m<sup>2</sup> due to small population size (n=38).
